# Supplementary material
Source: publisher figshare collection journal article supplement (https://gsapubs.figshare.com/articles/dataset/_/24101595)
Supplement: Supplementary file 1 [file 1]

## Sheet: Zircon U-Pb dating
Table S1-1
Zircon U-Pb dating of T3ZX intrusive rocks and Caolong granites
			Hf	PbTotal	232Th	238U	PbCommon	207Pb/206Pb	207Pb/206Pb	207Pb/235U	207Pb/235U	206Pb/238U	206Pb/238U		208Pb/232Th	208Pb/232Th	238U/232Th		207Pb/206Pb	207Pb/206Pb	207Pb/235U	207Pb/235U	206Pb/238U	206Pb/238U	208Pb/232Th	208Pb/232Th	238U/232Th
			ppm	ppm	ppm	ppm	ppm	Ratio	1sigma	Ratio	1sigma	Ratio	1sigma	rho	Ratio	1sigma	Ratio		Age (Ma)	1sigma	Age (Ma)	1sigma	Age (Ma)	1sigma	Age (Ma)	1sigma		Concordance
19ZD02-1
Rep	20210603C042	19ZD02-1-01	11561	15.207	117.172	388.209	0.588371	0.0523599	0.00158816	0.24064	0.00731158	0.0334049	0.000370115	0.364655	0.0113075	0.000343037	3.17863	1	301.91	68.51	218.945	5.9859	211.823	2.31162	227.268	6.85602	1	96%
Rep	20210603C043	19ZD02-1-02	9496	12.9079	136.261	323.381	0.964132	0.0507299	0.00142772	0.226826	0.00612179	0.0325638	0.000359431	0.408974	0.0106159	0.000314195	2.27082	1	227.845	69.4325	207.575	5.06867	206.574	2.24674	213.44	6.28386	1	99%
Rep	20210603C044	19ZD02-1-03	9770	8.649	113.231	206.314	0.271455	0.0515318	0.00186861	0.233914	0.00816602	0.033277	0.00040549	0.349046	0.0114523	0.000323555	1.77002	1	264.88	78.69	213.425	6.72135	211.025	2.53234	230.16	6.46572	1	98%
Rep	20210603C045	19ZD02-1-04	9400	12.6044	149.846	308.619	1.13039	0.0504758	0.00159827	0.231181	0.00747774	0.0332205	0.000395003	0.367601	0.0105729	0.000291289	2.01539	1	216.74	72.21	211.173	6.16874	210.673	2.46711	212.579	5.82601	1	99%
Rep	20210603C047	19ZD02-1-06	11904	29.6263	188.537	761.331	0.0854001	0.0506383	0.00104373	0.23729	0.00498088	0.0339049	0.000292571	0.411094	0.0108193	0.000248763	3.7904	1	233.4	48.1375	216.199	4.09021	214.942	1.82787	217.508	4.97424	1	99%
Rep	20210603C048	19ZD02-1-07	11376	19.4984	150.805	496.553	0.40498	0.0523123	0.00115319	0.240991	0.00539047	0.0334209	0.000359447	0.480828	0.0113627	0.000313726	3.19013	1	298.21	47.2175	219.231	4.41302	211.923	2.24512	228.369	6.26985	1	96%
Rep	20210603C049	19ZD02-1-08	11760	14.7843	108.293	377.757	0.0904146	0.0521732	0.00140287	0.243083	0.00674742	0.0337191	0.000368833	0.394067	0.0110433	0.000346494	3.34824	1	300.06	61.105	220.942	5.51352	213.783	2.30299	221.986	6.92691	1	96%
Rep	20210603C054	19ZD02-1-9	10756	8.26129	79.7837	205.887	0.549881	0.0496768	0.00161132	0.230552	0.00783375	0.0336679	0.000445385	0.389331	0.0102868	0.000371611	2.57637	1	188.97	75.915	210.654	6.46556	213.463	2.78001	206.857	7.4346	1	98%
Rep	20210603C055	19ZD02-1-10	10265	12.5943	110.392	309.581	0.0583392	0.0490516	0.00153664	0.231317	0.00744123	0.0341892	0.000349733	0.317989	0.0108449	0.000322472	2.73149	1	150.085	72.21	211.286	6.13795	216.714	2.18313	218.02	6.44794	1	97%
Rep	20210603C056	19ZD02-1-11	9834	36.9854	269.974	958.698	0.703726	0.0492797	0.0009635	0.225046	0.00472671	0.0329912	0.000311969	0.450222	0.0105569	0.000232513	3.46713	1	161.195	41.66	206.101	3.92025	209.242	1.95013	212.26	4.65052	1	98%
Rep	20210603C057	19ZD02-1-12	9429	12.6812	144.811	309.179	0	0.05487	0.00174734	0.255228	0.00839528	0.0338259	0.000416219	0.374081	0.0118323	0.000359459	2.29064	1	405.605	65.735	230.814	6.79295	214.449	2.59791	237.753	7.18051	1	92%
Rep	20210603C058	19ZD02-1-13	11365	13.4778	118.231	340.572	1.20859	0.0477001	0.00118445	0.223017	0.00623314	0.0337811	0.000407108	0.431189	0.0104236	0.000286498	2.84982	1	83.425	54.625	204.418	5.1768	214.17	2.54126	209.593	5.73102	1	95%
Rep	20210603C059	19ZD02-1-14	11825	21.3939	143.695	558.363	0	0.0482552	0.00111915	0.222824	0.00529557	0.0335531	0.000361903	0.453846	0.0107166	0.000297302	3.76471	1	122.31	53.7	204.258	4.39942	212.748	2.26016	215.455	5.94542	1	95%
Rep	20210603C060	19ZD02-1-15	9980	10.918	109.995	271.497	0.522817	0.0509273	0.00169113	0.238091	0.00811943	0.0341007	0.000439092	0.377581	0.0108452	0.00033117	2.38941	1	238.955	77.765	216.856	6.66054	216.162	2.73972	218.025	6.62187	1	99%
Rep	20210603C061	19ZD02-1-16	11810	17.2983	132.115	449.58	0	0.0498843	0.00142473	0.232022	0.00704669	0.0337268	0.000402866	0.393304	0.0105631	0.000281561	3.43166	1	190.82	66.655	211.866	5.80939	213.831	2.51496	212.384	5.63149	1	99%
Rep	20210603C064	19ZD02-1-17	10176	11.6581	113.83	291.544	0.208599	0.0479863	0.00146146	0.221203	0.00693781	0.0335271	0.000415284	0.394929	0.0108047	0.000333663	2.54005	1	98.24	67.585	202.911	5.77017	212.585	2.59279	217.216	6.67199	1	95%
Rep	20210603C065	19ZD02-1-18	11006	13.7	113.278	353.834	0.408937	0.0483507	0.00140139	0.220599	0.00647999	0.0331485	0.000358952	0.368639	0.0104276	0.000316504	3.16572	1	116.755	63.8825	202.408	5.39228	210.224	2.24258	209.673	6.33123	1	96%
Rep	20210603C066	19ZD02-1-19	9996	5.68756	59.5119	147.149	0.0202299	0.0502367	0.00197974	0.227675	0.00934787	0.0329861	0.000472958	0.349215	0.0101327	0.000432159	2.46352	1	205.63	86.0975	208.277	7.73272	209.211	2.95368	203.774	8.64728	1	99%
Rep	20210603C067	19ZD02-1-20	9959	11.311	116.079	272.99	0.439774	0.0512577	0.0015873	0.238971	0.00752092	0.0338492	0.000408929	0.38386	0.0115465	0.000321825	2.31784	1	253.77	65.73	217.577	6.16545	214.594	2.55245	232.044	6.43056	1	98%
Rep	20210603C068	19ZD02-1-21	10343	12.1853	125.008	305.884	0.97302	0.0513157	0.00165725	0.237179	0.00819004	0.0333528	0.000398185	0.345734	0.0108812	0.000332999	2.43399	1	253.77	69.4325	216.108	6.72337	211.498	2.48664	218.746	6.65821	1	97%
Rep	20210603C069	19ZD02-1-22	9749	9.6425	100.004	241.326	1.42239	0.0495072	0.00153653	0.225995	0.00746841	0.0330563	0.000423425	0.387608	0.0103755	0.000289679	2.39393	1	172.305	72.21	206.887	6.18702	209.649	2.64466	208.631	5.79494	1	98%
Rep	20210603C070	19ZD02-1-23	10322	6.96942	72.9985	176.022	0.29484	0.0494109	0.00185037	0.220172	0.00769509	0.0327292	0.000429333	0.375325	0.0109556	0.000400254	2.46659	1	168.6	88.875	202.053	6.40505	207.607	2.68229	220.234	8.00234	1	97%
Rep	20210603C071	19ZD02-1-24	11289	12.3017	103.414	313.501	0.32948	0.0515439	0.00159745	0.237935	0.007235	0.0335077	0.000412937	0.405284	0.0109437	0.000320666	2.93896	1	264.88	76.84	216.728	5.93614	212.464	2.57821	219.995	6.4112	1	98%
19ZD03-1
Rep	20220729B32	19ZD03-1@2	11484	14.641	146.727	390.624	0.287262	0.0484925	0.00174058	0.229417	0.00807684	0.0344139	0.000456343	0.376653	0.009996	0.000384653	2.63776	1	124.16	85.175	209.718	6.67223	218.115	2.84634	201.038	7.69776	1	96%
Rep	20220729B33	19ZD03-1@3	11159	14.1857	140.927	372.991	0	0.0522345	0.00172729	0.246721	0.00847568	0.0341983	0.00039123	0.333013	0.0105132	0.000445895	2.65034	1	294.505	75.915	223.909	6.90463	216.77	2.44144	211.387	8.91876	1	96%
Rep	20220729B34	19ZD03-1@4	11065	14.5794	153.15	377.704	1.94479	0.0506999	0.00156267	0.241367	0.00786473	0.0344431	0.000337465	0.300692	0.0102882	0.000506132	2.45742	1	227.845	72.21	219.54	6.43473	218.296	2.10631	206.885	10.1259	1	99%
Rep	20220729B35	19ZD03-1@5	11497	19.5816	195.528	516.207	0	0.0502577	0.00172855	0.23548	0.00781134	0.0340373	0.000372153	0.329606	0.0110924	0.000427585	2.62724	1	205.63	79.6175	214.713	6.42143	215.767	2.32301	222.967	8.54763	1	99%
Rep	20220729B36	19ZD03-1@6	11690	16.7181	156.757	435.485	0.791974	0.0522577	0.00166226	0.248357	0.00780726	0.0344809	0.000373362	0.344453	0.0119421	0.000402467	2.75128	1	298.21	67.585	225.241	6.35208	218.532	2.32961	239.947	8.03875	1	96%
Rep	20220729B37	19ZD03-1@7	11658	11.9321	106.466	308.966	0	0.052221	0.00178351	0.251072	0.00879734	0.0348138	0.000340468	0.279107	0.0113518	0.00049745	2.90688	1	294.505	77.7675	227.446	7.14169	220.606	2.1243	228.153	9.94172	1	96%
Rep	20220729B38	19ZD03-1@8	10870	11.7449	121.378	302.517	0	0.0590876	0.00221491	0.276242	0.00993117	0.0339382	0.000364948	0.299111	0.0122305	0.000529787	2.47798	1	568.55	81.4675	247.672	7.90307	215.149	2.27835	245.706	10.5788	1	85%
Rep	20220729B39	19ZD03-1@9	10395	11.4925	115.561	305.693	0.628695	0.0521119	0.00163936	0.242633	0.00777098	0.0337108	0.000340697	0.315554	0.0103871	0.000548442	2.63999	1	300.06	72.2125	220.574	6.35161	213.731	2.12778	208.863	10.9713	1	96%
Rep	20220729B45	19ZD03-1@10	9653	10.5549	115.546	272.972	0	0.0498761	0.0018703	0.237907	0.00879831	0.0347293	0.0005276	0.410786	0.0115571	0.000565527	2.34068	1	190.82	88.875	216.705	7.21824	220.08	3.28912	232.256	11.3	1	98%
Rep	20220729B46	19ZD03-1@11	11171	18.9519	232.168	466.565	2.21062	0.0532326	0.00169208	0.258827	0.00887431	0.0351233	0.000364609	0.302766	0.0114444	0.000417093	2.01863	1	338.945	72.215	233.721	7.15987	222.534	2.27384	230.003	8.33498	1	95%
Rep	20220729B48	19ZD03-1@13	10905	12.5588	117.221	329.703	0	0.0476978	0.001368	0.228595	0.00705295	0.0346306	0.000334728	0.313276	0.0114307	0.000553773	2.81483	1	83.425	68.5125	209.038	5.83071	219.465	2.08894	229.729	11.0665	1	95%
Rep	20220729B50	19ZD03-1@15	12310	27.5767	229.042	740.603	1.88915	0.0535043	0.00131999	0.253244	0.00636972	0.0343027	0.000353813	0.410075	0.0111933	0.000400004	3.22781	1	350.055	55.55	229.208	5.16313	217.421	2.2083	224.985	7.99547	1	94%
Rep	20220729B51	19ZD03-1@16	10911	15.6018	184.595	407.474	0	0.0482351	0.00159413	0.227958	0.00763662	0.0342664	0.000369297	0.321707	0.0106446	0.000421794	2.21187	1	109.35	77.77	208.512	6.31622	217.195	2.30475	214.013	8.4356	1	95%
Rep	20220729B52	19ZD03-1@17	10459	11.1628	112.446	295.866	0	0.050554	0.00225218	0.239678	0.0102753	0.034507	0.000414725	0.280342	0.0104193	0.000533744	2.64581	1	220.44	99.06	218.157	8.41748	218.694	2.58701	209.507	10.6769	1	99%
Rep	20220729B58	19ZD03-1@18	10644	10.4214	109.8	275.051	0	0.0521942	0.00185161	0.24714	0.00853063	0.0344094	0.00038341	0.32281	0.0105175	0.000477376	2.51568	1	294.505	81.4725	224.251	6.94705	218.087	2.3923	211.472	9.54842	1	97%
Rep	20220729B59	19ZD03-1@19	10465	9.03918	113.743	225.964	1.36946	0.0554905	0.0025534	0.264652	0.0118526	0.0346989	0.000437362	0.281439	0.0116877	0.000618202	2.05106	1	431.53	101.843	238.409	9.51781	219.89	2.72745	234.865	12.3509	1	91%
Rep	20220729B60	19ZD03-1@20	10408	12.7788	139.445	331.955	0	0.0513459	0.00161925	0.243988	0.00761916	0.0344782	0.000397344	0.369049	0.0110011	0.000482825	2.39675	1	257.47	69.4325	221.681	6.22083	218.515	2.47889	221.143	9.65277	1	98%
Rep	20220729B61	19ZD03-1@21	10371	8.73156	96.9127	227.509	0	0.0501258	0.00212004	0.2386	0.0102876	0.0344235	0.000401359	0.270418	0.010842	0.00058621	2.35923	1	211.185	98.1325	217.273	8.43486	218.174	2.504	217.961	11.7215	1	99%
Rep	20220729B62	19ZD03-1@22	10942	11.3254	117.178	299.916	0	0.050035	0.00175699	0.23447	0.00793631	0.0340713	0.000385679	0.334431	0.0111806	0.000474104	2.56258	1	198.23	76.84	213.882	6.52943	215.979	2.40716	224.731	9.47675	1	99%
Rep	20220729B63	19ZD03-1@23	10504	16.6757	211.378	409.643	1.95072	0.057473	0.0016859	0.276674	0.00758574	0.0349397	0.000346056	0.36124	0.0118092	0.000451065	1.94206	1	509.3	64.8075	248.015	6.03556	221.39	2.15882	237.293	9.01061	1	88%
Rep	20220729B64	19ZD03-1@24	11797	19.9206	184.048	526.95	1.74304	0.0491701	0.00138348	0.233987	0.0069375	0.0343552	0.000276234	0.271189	0.0112181	0.000450852	2.85894	1	166.75	66.655	213.484	5.71035	217.749	1.72558	225.48	9.01163	1	98%
Rep	20220729B65	19ZD03-1@25	11354	19.6747	226.268	513.578	1.545	0.0524729	0.00161904	0.245348	0.00742984	0.0338738	0.00034355	0.334911	0.0112435	0.000477288	2.26367	1	305.615	70.365	222.791	6.05975	214.747	2.14524	225.987	9.5398	1	96%
20CD06-3
Rep	20220729A6	20CD06-3@1	10153	22.8501	157.922	613.435	0.363996	0.0524623	0.00141824	0.244955	0.00678049	0.033775	0.000292354	0.312707	0.0109663	0.000403737	3.92603	1	305.615	61.105	222.47	5.53222	214.132	1.82672	220.447	8.07191	1	96%
Rep	20220729A7	20CD06-3@2	10351	18.7741	142.818	490.979	0.497588	0.0483272	0.00133678	0.231848	0.00666093	0.0347057	0.000335855	0.336836	0.0111188	0.000464621	3.42076	1	122.31	66.66	211.723	5.49234	219.933	2.09581	223.496	9.28776	1	96%
Rep	20220729A8	20CD06-3@3	11298	57.5827	420.355	1503.31	0.994281	0.0519857	0.0010328	0.247998	0.0054984	0.0344539	0.000288322	0.377442	0.0114597	0.000317483	3.60672	1	283.395	44.44	224.948	4.47617	218.363	1.8006	230.309	6.34433	1	97%
Rep	20220729A11	20CD06-3@6	11728	40.0706	239.074	1083.51	0.200566	0.0498246	0.00129855	0.236091	0.00788205	0.0342216	0.000597585	0.523047	0.0104953	0.000510674	4.58251	1	187.12	65.73	215.214	6.47634	216.916	3.72665	211.027	10.2147	1	99%
Rep	20220729A12	20CD06-3@7	10457	34.103	268.014	913.816	2.69882	0.0504943	0.00122959	0.240489	0.00643829	0.0344481	0.000462067	0.501031	0.0112128	0.000386612	3.41083	1	216.74	55.545	218.821	5.27206	218.328	2.88189	225.375	7.72764	1	99%
Rep	20220729A13	20CD06-3@8	9998	13.9185	106.394	368.692	0	0.0505914	0.00148509	0.237098	0.00688148	0.033913	0.000296921	0.301662	0.0115788	0.000576402	3.507	1	220.44	66.655	216.041	5.65008	214.992	1.85493	232.689	11.517	1	99%
Rep	20220729A19	20CD06-3@9	7747	12.0289	130.284	305.248	0	0.0525299	0.00275092	0.246432	0.0129036	0.0339664	0.000425257	0.239105	0.0115014	0.000733647	2.34794	1	309.32	124.983	223.673	10.5128	215.325	2.65388	231.142	14.66	1	96%
Rep	20220729A20	20CD06-3@10	12043	16.2634	272.798	391.712	0	0.0488224	0.00336695	0.230896	0.0153164	0.0342286	0.00028348	0.124851	0.010129	0.000683933	1.43794	1	138.975	155.53	210.938	12.6356	216.959	1.77083	203.701	13.6852	1	97%
Rep	20220729A21	20CD06-3@11	9908	22.2631	166.915	609.835	0.143805	0.0497593	0.00132814	0.232834	0.00640296	0.0338878	0.000389873	0.418357	0.0113084	0.000445278	3.59654	1	183.415	67.58	212.536	5.27556	214.835	2.43367	227.285	8.89943	1	98%
Rep	20220729A22	20CD06-3@12	10397	20.5296	193.407	529.557	2.89714e-06	0.0505113	0.00166734	0.241561	0.0080142	0.0346684	0.000330685	0.287506	0.0108078	0.000425685	2.96114	1	216.74	80.5425	219.698	6.55593	219.7	2.06372	217.277	8.51205	1	99%
Rep	20220729A23	20CD06-3@13	10279	25.4691	274.504	647.591	0	0.0496804	0.00118643	0.237847	0.00598895	0.0346443	0.000302033	0.346233	0.0109109	0.000392934	2.34659	1	188.97	55.545	216.656	4.91484	219.55	1.88556	219.34	7.85636	1	98%
Rep	20220729A24	20CD06-3@14	10271	19.4235	178.626	501.506	2.82706	0.0503066	0.0013124	0.240496	0.00603219	0.0346765	0.000282464	0.324757	0.0108511	0.000396715	2.77942	1	209.33	93.505	218.826	4.93977	219.751	1.76385	218.144	7.93242	1	99%
Rep	20220729A25	20CD06-3@15	10453	29.2084	227.449	761.853	1.79347	0.0521425	0.00132544	0.248214	0.00608367	0.0345096	0.000242269	0.28643	0.0115624	0.000429805	3.28924	1	300.06	59.2525	225.124	4.95124	218.711	1.51428	232.361	8.58801	1	97%
Rep	20220729A26	20CD06-3@16	10886	18.4189	120.103	492.203	0	0.0542176	0.0017542	0.257688	0.0088662	0.0343449	0.000344457	0.291494	0.0123237	0.000558149	4.00165	1	388.94	72.215	232.802	7.1598	217.684	2.15	247.567	11.1441	1	93%
Rep	20220729A32	20CD06-3@17	10547	33.6755	272.728	912.223	0.900509	0.0495016	0.00109184	0.232371	0.00511663	0.0340509	0.000325775	0.434497	0.010237	0.000391046	3.27786	1	172.305	56.47	212.154	4.21819	215.852	2.03427	205.86	7.82383	1	98%
Rep	20220729A33	20CD06-3@18	10298	31.0437	241.935	841.794	1.50673	0.0513987	0.00128364	0.241645	0.00648864	0.0340706	0.000366679	0.400802	0.0107363	0.000376071	3.37547	1	257.47	55.5475	219.767	5.30834	215.975	2.28886	215.849	7.5205	1	98%
Rep	20220729A34	20CD06-3@19	10880	44.0011	294.1	1188.82	0	0.0523388	0.00109119	0.250361	0.0058205	0.0346317	0.000384582	0.477664	0.0117421	0.000400588	3.95666	1	301.91	46.29	226.87	4.72918	219.471	2.39912	235.952	8.00281	1	96%
Rep	20220729A35	20CD06-3@20	10486	24.4227	184.62	651.309	0.764357	0.0505368	0.00154066	0.241229	0.00747142	0.0346034	0.000339127	0.316424	0.0108493	0.000506569	3.43078	1	220.44	70.36	219.426	6.11379	219.295	2.11635	218.107	10.129	1	99%
Rep	20220729A36	20CD06-3@21	11222	49.702	412.773	1334.95	0	0.0526861	0.00112961	0.247113	0.00555681	0.0339881	0.000320003	0.418694	0.0108359	0.00033609	3.17298	1	322.28	49.995	224.228	4.52685	215.46	1.99845	217.839	6.72031	1	96%
Rep	20220729A37	20CD06-3@22	10320	23.9842	200.306	633.98	1.69904	0.0537651	0.00166745	0.252155	0.00819423	0.0339466	0.000294397	0.266869	0.0117578	0.000511418	3.11851	1	361.165	65.735	228.325	6.64658	215.201	1.83917	236.264	10.2168	1	94%
Rep	20220729A38	20CD06-3@23	11080	7.91048	68.663	205.375	3.32909	0.0516757	0.00225677	0.245129	0.0110198	0.0344641	0.000583168	0.376396	0.011283	0.000745435	2.98347	1	333.39	99.985	222.611	8.98777	218.427	3.63601	226.778	14.8988	1	98%
Rep	20220729A39	20CD06-3@24	10749	41.7555	320.708	1123.44	0.722587	0.0503059	0.00133842	0.236806	0.00603022	0.034147	0.000245102	0.281873	0.0108504	0.000373636	3.37559	1	209.33	93.505	215.801	4.95281	216.451	1.53232	218.129	7.47096	1	99%
Rep	20220729A45	20CD06-3@25	9684	18.9743	191.509	501.165	0	0.0544321	0.00177723	0.251707	0.00831518	0.0335113	0.000312614	0.282385	0.0110605	0.000471598	2.63036	1	390.79	69.4375	227.962	6.74704	212.487	1.95327	222.331	9.42776	1	92%
20CD06-4
Rep	20220728F126	20CD06-4@1	12134	62.7572	155.996	1742.89	0	0.0566094	0.00113771	0.265873	0.00552549	0.0340129	0.000214901	0.304018	0.0157289	0.00068536	11.6726	1	475.97	44.44	239.389	4.4351	215.615	1.34482	315.442	13.6381	1	89%
Rep	20220728F127	20CD06-4@2	9704	28.634	225.774	772.015	0	0.0494211	0.00158252	0.228759	0.00682445	0.0336004	0.000283822	0.283147	0.0104706	0.000518643	3.45257	1	168.6	71.285	209.173	5.64117	213.043	1.77389	210.533	10.3743	1	98%
Rep	20220728F128	20CD06-4@3	12094	75.272	414.176	2033.97	0	0.0503054	0.00175479	0.238731	0.00927034	0.03433	0.000414718	0.311094	0.0107748	0.000669927	4.9614	1	209.33	79.6175	217.381	7.60031	217.591	2.58738	216.618	13.3964	1	99%
Rep	20220728F129	20CD06-4@4	9642	20.866	158.218	560.635	1.9428	0.0505807	0.00140249	0.236128	0.00638465	0.0338776	0.00032679	0.356752	0.0106362	0.000644876	3.55485	1	220.44	58.3225	215.245	5.24654	214.771	2.04089	213.846	12.8972	1	99%
Rep	20220728F130	20CD06-4@5	12109	64.5713	196.258	1777.28	0.528053	0.0544653	0.00111391	0.257815	0.00528276	0.0342688	0.000261844	0.372899	0.013726	0.000605818	9.1123	1	390.79	46.29	232.905	4.26749	217.21	1.63624	275.546	12.0791	1	93%
Rep	20220728F136	20CD06-4@6	11945	42.0644	73.6485	1226.53	0.679585	0.0510973	0.00119173	0.236175	0.00563751	0.0334444	0.00027578	0.34545	0.0098021	0.000567174	16.4101	1	255.62	53.695	215.283	4.63292	212.069	1.72406	197.158	11.3526	1	98%
Rep	20220728F137	20CD06-4@7	11407	57.4472	171.707	1602.44	0.382729	0.0517164	0.00124994	0.242016	0.00517497	0.0339037	0.000253991	0.350355	0.0121542	0.000550543	9.37232	1	272.285	55.5475	220.07	4.23333	214.934	1.58788	244.182	10.9941	1	97%
Rep	20220728F138	20CD06-4@8	12263	66.8922	149.676	1897.97	0	0.0530768	0.00107843	0.248931	0.00508734	0.0339365	0.000250617	0.361352	0.00988928	0.000497969	12.8054	1	331.54	44.44	225.707	4.13887	215.139	1.56687	198.903	9.96651	1	95%
Rep	20220728F139	20CD06-4@9	11273	40.6306	126.198	1152.93	0	0.0512116	0.00113604	0.238034	0.00538838	0.0336285	0.000257772	0.338617	0.0103113	0.000498402	9.22357	1	250.065	51.84	216.809	4.42178	213.218	1.61176	207.347	9.971	1	98%
Rep	20220728F141	20CD06-4@11	11265	28.9627	96.5222	835.604	2.44565	0.0514374	0.00131874	0.236949	0.00614552	0.033386	0.000382223	0.441418	0.0106473	0.000533106	8.54878	1	261.175	52.77	215.919	5.04685	211.705	2.3871	214.069	10.6618	1	98%
Rep	20220728F143	20CD06-4@13	11378	34.5589	98.6604	988.984	0	0.0530486	0.00137864	0.245818	0.0064372	0.0335422	0.000296936	0.338056	0.0112298	0.000622945	9.87385	1	331.54	26.85	223.174	5.24873	212.68	1.85561	225.715	12.4513	1	95%
Rep	20220728F149	20CD06-4@14	10315	21.7081	145.99	594.052	2.80485	0.0516055	0.00138736	0.240257	0.00695016	0.0336604	0.000371861	0.381895	0.0108742	0.000524981	4.04637	1	333.39	61.1025	218.631	5.69195	213.417	2.32197	218.605	10.4969	1	97%
Rep	20220728F150	20CD06-4@15	10041	22.5052	137.412	604.938	0	0.0510219	0.00146891	0.239304	0.00677312	0.0340191	0.000342755	0.355978	0.0107285	0.000502114	4.46471	1	242.66	66.655	217.85	5.55131	215.653	2.14002	215.692	10.0411	1	98%
Rep	20220728F151	20CD06-4@16	10402	33.008	156.569	926.937	1.47205	0.0541527	0.00156231	0.249661	0.00725434	0.0334118	0.000331941	0.341912	0.0113122	0.000435603	6.25959	1	375.98	66.66	226.301	5.89635	211.866	2.0738	227.361	8.70602	1	93%
Rep	20220728F152	20CD06-4@17	9770	22.3514	169.49	605.822	0.250356	0.0525538	0.00152197	0.243453	0.00717896	0.0335515	0.000331324	0.334884	0.0106871	0.000433509	3.61225	1	309.32	66.66	221.244	5.86415	212.738	2.06971	214.864	8.66952	1	96%
Rep	20220728F153	20CD06-4@18	11383	71.104	359.92	1925.49	0.872512	0.0545555	0.00105965	0.257045	0.00486644	0.0341618	0.000246002	0.380361	0.0119241	0.000354017	5.39083	1	394.495	42.5875	232.283	3.93406	216.543	1.5379	239.586	7.07116	1	92%
Rep	20220728F154	20CD06-4@19	12156	62.0976	164.086	1689.43	0	0.0607881	0.00110314	0.287987	0.00555094	0.0342966	0.000217335	0.328764	0.0179493	0.00100376	10.2405	1	631.5	39.65	256.973	4.37956	217.383	1.35965	359.578	19.9304	1	83%
Rep	20220728F155	20CD06-4@20	11122	55.9968	214.624	1522.38	1.9424	0.0575449	0.00131757	0.271236	0.00600232	0.0342797	0.000432103	0.569612	0.0146187	0.000689634	7.78947	1	522.26	49.995	243.682	4.79713	217.278	2.69575	293.338	13.7382	1	88%
Rep	20220728F156	20CD06-4@21	10954	36.7978	154.599	1022.62	2.00572	0.0510141	0.00153425	0.240843	0.00780915	0.0341974	0.00038549	0.347656	0.0101733	0.000535549	6.61041	1	242.66	68.5075	219.11	6.39197	216.765	2.40571	204.586	10.7156	1	98%
Rep	20220728F162	20CD06-4@22	10371	20.9061	170.947	567.392	0	0.0521603	0.00166046	0.242678	0.00848876	0.033567	0.000323043	0.275128	0.0101742	0.000461655	3.60609	1	300.06	74.065	220.611	6.93773	212.834	2.01811	204.604	9.2371	1	96%
Rep	20220728F163	20CD06-4@23	10913	23.8558	85.9883	663.714	0	0.0528714	0.00150727	0.252714	0.00729808	0.0346615	0.000371635	0.371271	0.0121445	0.000606789	7.81176	1	324.13	64.81	228.778	5.91748	219.657	2.31849	243.988	12.1174	1	95%
Rep	20220728F164	20CD06-4@24	11602	63.6053	244.701	1778.63	0	0.0522901	0.00109401	0.243379	0.00548721	0.0336826	0.000344859	0.454118	0.0124689	0.000463188	7.28644	1	298.21	48.1425	221.184	4.48355	213.555	2.15376	250.465	9.24676	1	96%
20CD07-1
Rep	20220729A86	20CD07-1@1	11978	18.7183	167.815	502.254	0.483804	0.0450551	0.00415492	0.203885	0.0217654	0.0333609	0.000363681	0.102118	0.00917573	0.00117338	2.95472	1	error		188.408	18.3579	211.549	2.27163	184.616	23.5009	1	88%
Rep	20220729A87	20CD07-1@2	12484	24.8374	191.371	674.256	2.05966	0.045655	0.00372774	0.207543	0.019035	0.0335069	0.000267104	0.0869159	0.00899581	0.00106994	3.47515	1	error		191.488	16.0065	212.46	1.66999	181.012	21.433	1	89%
Rep	20220729A88	20CD07-1@3	11742	15.9529	120.422	430.218	0	0.0467138	0.00316436	0.213499	0.0162181	0.0336544	0.000389422	0.152327	0.00980469	0.000945944	3.52107	1	35.28	155.54	196.485	13.571	213.379	2.43137	197.209	18.934	1	91%
Rep	20220729A89	20CD07-1@4	11501	19.0779	116.099	527.751	1.91466	0.045131	0.00254067	0.205533	0.0129616	0.0332762	0.000258224	0.123051	0.0104699	0.000857193	4.46828	1	error		189.797	10.9179	211.02	1.61503	210.52	17.1463	1	89%
Rep	20220729A90	20CD07-1@5	12016	18.4789	146.458	489.25	0	0.0500427	0.00230336	0.231488	0.0116052	0.0337892	0.000355449	0.209833	0.0109266	0.000679131	3.28088	1	198.23	107.39	211.426	9.5698	214.22	2.21949	219.653	13.5784	1	98%
Rep	20220729A91	20CD07-1@6	12330	27.2208	195.397	737.299	0.894243	0.0505959	0.00176634	0.233004	0.00853526	0.0335381	0.000320793	0.261116	0.0106189	0.000528924	3.72507	1	233.4	81.4675	212.676	7.0303	212.654	2.00416	213.499	10.5784	1	99%
Rep	20220729A98	20CD07-1@8	12007	20.3658	145.182	572.465	0.139082	0.051817	0.00148063	0.234578	0.0067261	0.0327877	0.000318526	0.338812	0.0104053	0.000451761	3.8773	1	275.99	66.66	213.971	5.53382	207.972	1.99133	209.228	9.03706	1	97%
Rep	20220729A101	20CD07-1@11	12305	23.6092	214.99	638.69	1.06172	0.0513568	0.00165336	0.23505	0.00784327	0.0331246	0.000308008	0.27866	0.0105537	0.000377823	2.95641	1	257.47	69.4325	214.359	6.44991	210.075	1.92523	212.197	7.5569	1	97%
Rep	20220729A102	20CD07-1@12	12443	22.3283	155.839	613.417	0	0.0507511	0.00140939	0.235291	0.00625002	0.0336862	0.000386835	0.432312	0.0111416	0.000556936	3.91414	1	227.845	67.58	214.557	5.13945	213.578	2.41519	223.951	11.1329	1	99%
Rep	20220729A103	20CD07-1@13	12176	16.8461	122.154	467.231	0	0.052649	0.00179302	0.242365	0.0079946	0.033461	0.000319605	0.289566	0.0100752	0.000466678	3.81043	1	322.28	77.77	220.355	6.53569	212.173	1.99689	202.622	9.33852	1	96%
Rep	20220729A104	20CD07-1@14	12181	21.9418	198.121	581.972	1.00437	0.0525626	0.0011936	0.245601	0.00626213	0.0338118	0.000375743	0.435845	0.0110929	0.000492455	2.92288	1	309.32	51.8475	222.997	5.10698	214.361	2.34583	222.978	9.84441	1	96%
Rep	20220729A110	20CD07-1@15	11133	16.4853	104.65	466.365	1.51057	0.0518841	0.0017151	0.238883	0.00713587	0.0336291	0.000519543	0.517183	0.00984971	0.000580596	4.35466	1	279.69	71.2875	217.505	5.8504	213.221	3.24227	198.11	11.6207	1	98%
Rep	20220729A111	20CD07-1@16	12874	33.2618	265.14	898.725	0	0.0497989	0.00117701	0.232766	0.00562138	0.0338537	0.000280708	0.343339	0.0106296	0.000459901	3.35231	1	187.12	55.545	212.479	4.63238	214.622	1.75414	213.714	9.19785	1	98%
Rep	20220729A112	20CD07-1@17	12413	16.7222	112.117	458.627	0	0.0507214	0.00172379	0.236673	0.0076159	0.0339282	0.000330669	0.302872	0.0104991	0.00051861	4.09451	1	227.845	79.6175	215.692	6.25484	215.087	2.06495	211.104	10.3733	1	99%
Rep	20220729A114	20CD07-1@19	11232	20.882	183.857	562.124	0.460833	0.0505025	0.00149009	0.230775	0.00654513	0.0331672	0.000356709	0.379206	0.0109702	0.000434794	3.04662	1	216.74	66.655	210.838	5.4016	210.34	2.22857	220.525	8.6928	1	99%
Rep	20220729A120	20CD07-1@20	12248	27.7606	238.884	773.399	0.98546	0.0498455	0.00142814	0.224254	0.00663928	0.0325451	0.000269967	0.280184	0.0102186	0.000401346	3.25364	1	187.12	66.655	205.444	5.50832	206.457	1.68915	205.492	8.03003	1	99%
Rep	20220729A121	20CD07-1@21	12115	24.7174	151.35	696.914	0	0.0505306	0.00142733	0.228957	0.00614127	0.0328547	0.000271169	0.307706	0.0105611	0.000472451	4.51598	1	220.44	64.8025	209.337	5.07601	208.39	1.6962	212.344	9.44949	1	99%
Rep	20220729A122	20CD07-1@22	12781	34.8901	197.831	962.706	0.972539	0.0509481	0.00116883	0.238726	0.00606795	0.0339086	0.000418212	0.485226	0.0110195	0.00037843	5.16025	1	238.955	58.3225	217.377	4.97609	214.965	2.61013	221.51	7.56555	1	98%
Rep	20220729A123	20CD07-1@23	12228	20.4359	154.971	566.984	0.563185	0.0520338	0.00150083	0.238942	0.0073521	0.0331925	0.000326611	0.319796	0.0102694	0.000547193	3.64971	1	287.1	64.8075	217.554	6.02728	210.498	2.04099	206.508	10.9476	1	96%
Rep	20220729A124	20CD07-1@24	12009	18.1062	147.062	497.636	1.69363	0.0516469	0.00170771	0.23829	0.00770763	0.033436	0.000287492	0.265825	0.0103121	0.000462573	3.41033	1	333.39	75.915	217.019	6.32189	212.018	1.79698	207.363	9.25421	1	97%
Rep	20220729A125	20CD07-1@25	11402	12.9366	113.444	355.837	0	0.0519037	0.00187875	0.234639	0.00787378	0.0328959	0.000355003	0.321593	0.0111776	0.000524816	3.14038	1	279.69	83.32	214.021	6.47714	208.647	2.21848	224.672	10.4905	1	97%
20CD09-2
Rep	20220729A46	20CD09-2@1	11720	29.1089	129.017	838.816	0	0.0517352	0.00151279	0.23861	0.00773899	0.033407	0.000488606	0.450947	0.0106441	0.000756568	6.34164	1	272.285	66.6575	217.282	6.34596	211.836	3.05008	214.004	15.1309	1	97%
Rep	20220729A47	20CD09-2@2	11746	25.2547	113.51	698.866	0	0.0526625	0.00116666	0.248006	0.00520919	0.0341755	0.000315766	0.43989	0.0105462	0.000491571	6.72598	1	322.28	49.995	224.955	4.24098	216.628	1.97176	212.046	9.83205	1	96%
Rep	20220729A48	20CD09-2@3	11986	41.5385	205.031	1138.9	0.474695	0.0517151	0.00133235	0.246692	0.00677619	0.0345717	0.000526057	0.553965	0.0112964	0.000790323	5.4641	1	272.285	59.2525	223.886	5.52104	219.098	3.27999	227.046	15.7958	1	97%
Rep	20220729A49	20CD09-2@4	11125	52.4122	290.846	1452.88	0.766458	0.0515033	0.00108993	0.23914	0.00470555	0.0336386	0.000212219	0.320618	0.0106301	0.000344706	4.96708	1	264.88	54.6225	217.716	3.85869	213.281	1.32853	213.724	6.89399	1	97%
Rep	20220729A50	20CD09-2@5	11477	31.4603	152.111	886.168	0.263212	0.0524039	0.00114602	0.241673	0.005164	0.0334269	0.000301291	0.421825	0.0107747	0.000431881	5.79578	1	301.91	49.995	219.789	4.22553	211.96	1.88291	216.616	8.63623	1	96%
Rep	20220729A51	20CD09-2@6	11995	46.8177	384.054	1273.66	0	0.0507472	0.00101428	0.234413	0.00439957	0.0334537	0.000232808	0.370789	0.0100389	0.000303424	3.31713	1	227.845	43.51	213.835	3.62185	212.127	1.45671	201.896	6.07192	1	99%
Rep	20220729A52	20CD09-2@7	10907	59.3577	366.257	1634.49	0	0.0500995	0.00108179	0.235109	0.00547574	0.033948	0.000341598	0.432045	0.0112058	0.000374557	4.88133	1	198.23	52.7675	214.408	4.50396	215.21	2.13295	225.234	7.48674	1	99%
Rep	20220729A58	20CD09-2@8	10625	39.5247	212.4	1068.29	1.24295	0.0527521	0.00123681	0.250796	0.0054912	0.0345493	0.000405765	0.536399	0.0116089	0.000423135	5.03034	1	316.725	53.6975	227.222	4.46038	218.958	2.53114	233.29	8.45436	1	96%
Rep	20220729A59	20CD09-2@9	10545	27.6276	179.15	739.921	1.59537	0.0539905	0.00142663	0.256724	0.00852282	0.0343057	0.00047326	0.415543	0.012972	0.000531358	4.09067	1	372.275	59.2525	232.023	6.88791	217.44	2.95198	260.508	10.6024	1	93%
Rep	20220729A60	20CD09-2@10	11580	41.4575	182.845	1164.57	2.31399	0.0507275	0.00109613	0.237098	0.00542055	0.0338117	0.000237725	0.307533	0.0107685	0.000442283	6.29553	1	227.845	49.99	216.041	4.4515	214.36	1.48687	216.492	8.84428	1	99%
Rep	20220729A61	20CD09-2@11	11141	46.3985	241.187	1296.82	0	0.0501419	0.0011182	0.235055	0.00578753	0.0339444	0.000391681	0.468641	0.0106626	0.000410961	5.38696	1	211.185	51.8425	214.363	4.76037	215.188	2.44481	214.375	8.21881	1	99%
Rep	20220729A62	20CD09-2@12	11163	35.2005	141.29	1003.77	1.99615	0.0514137	0.00123541	0.237561	0.00556305	0.0335342	0.000332577	0.423513	0.00979679	0.000424857	6.93748	1	261.175	55.5475	216.421	4.5667	212.63	2.07754	197.051	8.50399	1	98%
Rep	20220729A63	20CD09-2@13	10876	69.1574	504.728	1897.54	0.0345077	0.0501576	0.000892012	0.231333	0.00478857	0.0333662	0.000283481	0.410439	0.0102822	0.000335685	3.71783	1	211.185	40.7325	211.298	3.95137	211.582	1.77212	206.765	6.71589	1	99%
Rep	20220729A64	20CD09-2@14	11672	45.8949	206.448	1269.37	0	0.0488861	0.00125204	0.232134	0.00611726	0.0343945	0.000267495	0.295127	0.00999606	0.000478978	6.06388	1	142.68	65.7325	211.959	5.0432	217.994	1.6712	201.04	9.5854	1	97%
Rep	20220729A65	20CD09-2@15	11859	67.3586	294.553	1893.89	2.60459	0.0504652	0.00100254	0.233936	0.0047514	0.0336095	0.000302283	0.442821	0.0107951	0.000383575	6.34134	1	216.74	46.2875	213.443	3.91253	213.099	1.88879	217.023	7.67011	1	99%
Rep	20220729A71	20CD09-2@16	11597	38.3813	208.302	1037.06	0	0.0498698	0.00215637	0.236119	0.0114409	0.0345589	0.000251186	0.150005	0.0099944	0.000629337	4.85846	1	187.12	101.838	215.238	9.39903	219.018	1.56962	201.006	12.5944	1	98%
Rep	20220729A72	20CD09-2@17	11411	39.3309	182.859	1094.66	1.69296	0.0501287	0.00259331	0.229383	0.0136395	0.0334876	0.000276372	0.138795	0.0107837	0.000853545	5.91822	1	211.185	120.353	209.689	11.2661	212.339	1.72769	216.795	17.068	1	98%
Rep	20220729A73	20CD09-2@18	11040	27.2999	139.328	761.112	1.85769	0.0457806	0.00300973	0.209423	0.0157892	0.0335961	0.000322933	0.127493	0.00951743	0.000891055	5.38029	1	error		193.068	13.2567	213.016	2.01738	191.459	17.8404	1	90%
Rep	20220729A74	20CD09-2@19	11444	52.7755	267.353	1492.73	0.887018	0.0446808	0.00343406	0.202354	0.0180629	0.0333447	0.000335534	0.112729	0.00931547	0.00100831	5.46636	1	error		187.116	15.2545	211.447	2.09631	187.415	20.1921	1	87%
Rep	20220729A75	20CD09-2@20	11425	48.9693	285.012	1355.22	1.95482	0.0461337	0.00414682	0.209316	0.0219284	0.0334803	0.000250799	0.0715045	0.00881203	0.00112379	4.70263	1	400.05	-190.72	192.979	18.4123	212.294	1.56858	177.331	22.5159	1	90%
Rep	20220729A76	20CD09-2@21	10900	42.9237	232.884	1184.5	1.60035	0.0441197	0.00455825	0.200402	0.0242359	0.0336538	0.000315622	0.0775488	0.00895143	0.00131555	5.03687	1	error		185.466	20.5008	213.376	1.97175	180.123	26.3544	1	86%
Rep	20220729A77	20CD09-2@22	10997	44.7488	230.11	1260	0	0.0437452	0.00515087	0.197506	0.0273336	0.0335886	0.000449394	0.0966762	0.00879118	0.00147399	5.38042	1	error		183.014	23.1769	212.969	2.8052	176.913	29.5331	1	84%
Rep	20220729A78	20CD09-2@23	11434	33.8609	204.036	926.152	0	0.0438623	0.0058323	0.197716	0.0309406	0.0335848	0.000297159	0.0565403	0.0084977	0.0016086	4.8435	1	error		183.191	26.2307	212.945	1.85693	171.032	32.2395	1	84%
Rep	20220729A84	20CD09-2@24	10682	37.1165	117.842	1060.74	2.31453	0.0535934	0.006498	0.245477	0.03551	0.0334621	0.000557081	0.115087	0.0156376	0.00319074	8.80903	1	353.76	275.887	222.896	28.9501	212.18	3.47678	313.624	63.4989	1	95%
Rep	20220729A85	20CD09-2@25	11174	44.9344	206.845	1234	0	0.0453011	0.00468853	0.211035	0.0256273	0.034409	0.000422809	0.101187	0.0100484	0.00146743	5.83701	1	error		194.421	21.4875	218.084	2.63757	202.087	29.3649	1	88%
19XKRW03
Rep	20210603D020	19XKRW03-1	11520	115.087	453.718	3036.47	1.78676	0.0516879	0.000816219	0.241151	0.00419049	0.0337422	0.000309645	0.5281	0.0107676	0.000232405	6.84125	1	272.285	35.1825	219.363	3.43147	213.927	1.9344	216.474	4.64738	1	97%
Rep	20210603D021	19XKRW03-2	11485	143.391	592.87	3739.27	1.28184	0.0518039	0.000739842	0.240066	0.00381067	0.0335218	0.000304592	0.572428	0.0109403	0.00020476	6.19847	1	275.99	33.33	218.475	3.12377	212.552	1.9033	219.927	4.09388	1	97%
Rep	20210603D022	19XKRW03-3	11615	103.507	333.975	2782.34	1.34811	0.0507229	0.000724216	0.238389	0.00400102	0.0339575	0.000325519	0.571158	0.010952	0.000232198	8.58879	1	227.845	33.325	217.1	3.28385	215.269	2.03284	220.161	4.64239	1	99%
Rep	20210603D023	19XKRW03-4	12135	130.398	389.617	3492.84	0.216443	0.0502786	0.000683521	0.240089	0.00390223	0.034546	0.000357266	0.636287	0.0105504	0.000217968	8.46647	1	209.33	31.4725	218.493	3.19859	218.938	2.22932	212.131	4.35963	1	99%
Rep	20210603D024	19XKRW03-5	11175	94.6305	335.092	2526.79	0	0.0503793	0.000697163	0.233894	0.00354644	0.0335809	0.000280221	0.550343	0.010479	0.000209913	7.62093	1	213.035	26.845	213.408	2.92201	212.921	1.75151	210.701	4.19882	1	99%
Rep	20210603D025	19XKRW03-6	9935	24.3918	181.419	615.743	0.268488	0.0500765	0.00100936	0.239613	0.00500907	0.0347416	0.000391936	0.539659	0.0110509	0.000273904	3.29329	1	198.23	52.7675	218.104	4.10568	220.156	2.44465	222.138	5.47569	1	99%
Rep	20210603D026	19XKRW03-7	11185	100.565	441.19	2624.66	1.21956	0.0504192	0.000744865	0.238006	0.00401098	0.03414	0.000335529	0.583182	0.0106804	0.000201407	5.7803	1	213.035	33.325	216.786	3.29301	216.407	2.09482	214.731	4.02787	1	99%
Rep	20210603D027	19XKRW03-8	10984	82.8405	276.891	2206.16	0.532643	0.0512076	0.000765917	0.238476	0.0041115	0.033646	0.000323767	0.558139	0.010373	0.000246817	7.86774	1	250.065	33.3275	217.171	3.37411	213.327	2.02248	208.581	4.93751	1	98%
Rep	20210603D032	19XKRW03-9	10929	79.4217	297.326	2086.26	1.03165	0.0504108	0.000871856	0.240202	0.00488352	0.0343487	0.00036305	0.519876	0.0111161	0.000275442	6.81187	1	213.035	40.7325	218.586	4.00102	217.708	2.2657	223.441	5.50609	1	99%
Rep	20210603D033	19XKRW03-10	11894	201.751	1148.24	5113.66	0.62936	0.0510897	0.000719156	0.247418	0.004429	0.0349397	0.000420335	0.672049	0.0114009	0.000247587	4.65073	1	255.62	31.4775	224.476	3.60839	221.39	2.6209	229.133	4.94787	1	98%
Rep	20210603D034	19XKRW03-11	11287	105.859	329.984	2772.21	1.03838	0.0495547	0.000715569	0.236503	0.00391523	0.0344562	0.000348261	0.610545	0.011102	0.000231202	8.21902	1	172.305	35.1775	215.553	3.21842	218.378	2.17346	223.159	4.6218	1	98%
Rep	20210603D035	19XKRW03-12	11337	94.1725	350.671	2410.09	1.06845	0.0498078	0.000717573	0.240024	0.00383788	0.0347577	0.000318901	0.573809	0.0106931	0.000205372	6.73317	1	187.12	33.325	218.44	3.14612	220.257	1.99027	214.983	4.1071	1	99%
Rep	20210603D036	19XKRW03-13	12638	108.664	323.238	2902.41	0.935347	0.0500204	0.000713316	0.241606	0.00412001	0.0348342	0.000396961	0.66827	0.0111133	0.000261091	8.36131	1	194.525	33.325	219.735	3.37265	220.733	2.47571	223.385	5.21923	1	99%
Rep	20210603D037	19XKRW03-14	11506	80.6672	255.854	2186.83	0.447067	0.0485405	0.000776323	0.234126	0.00462744	0.0347703	0.000484306	0.704728	0.0108402	0.000282629	8.18079	1	124.16	37.0325	213.599	3.81002	220.335	3.01948	217.926	5.65131	1	96%
Rep	20210603D038	19XKRW03-15	10851	138.015	683.951	3501.26	0.666132	0.050061	0.000753092	0.239278	0.00389104	0.0343814	0.000309772	0.554058	0.0107012	0.000227489	5.0058	1	198.23	35.1775	217.829	3.19151	217.912	1.93413	215.147	4.54938	1	99%
Rep	20210603D039	19XKRW03-16	11697	133.766	388.896	3606.36	0	0.0495364	0.000850053	0.233946	0.00434549	0.033979	0.000357831	0.566951	0.0109359	0.000269101	8.96732	1	172.305	40.7325	213.451	3.57874	215.404	2.23395	219.839	5.38029	1	99%
Rep	20210603D042	19XKRW03-17	11430	151.586	889.19	3896.32	0.938692	0.0496745	0.000850253	0.237608	0.00451587	0.0343563	0.000366378	0.561103	0.0110463	0.000273257	4.89241	1	188.97	40.7325	216.46	3.70792	217.756	2.2864	222.046	5.46278	1	99%
Rep	20210603D043	19XKRW03-18	11792	115.515	467.682	3041.49	0.733602	0.0495651	0.000792641	0.232833	0.00380347	0.0338345	0.000316466	0.572575	0.0104973	0.000219209	6.58255	1	176.01	6.48	212.535	3.13594	214.502	1.9767	211.067	4.38468	1	99%
Rep	20210603D044	19XKRW03-19	11424	121.304	446.028	3165.74	0.20098	0.0487255	0.000760508	0.235864	0.00415074	0.034816	0.000361279	0.589657	0.0108286	0.000222559	6.80924	1	200.075	37.0325	215.028	3.41337	220.62	2.25375	217.694	4.45022	1	97%
Rep	20210603D045	19XKRW03-20	11219	100.254	446.266	2649.2	0.28747	0.0500876	0.000750428	0.234991	0.00383077	0.0337883	0.000338022	0.613684	0.0105328	0.000216949	5.79505	1	198.23	35.175	214.311	3.15294	214.214	2.11098	211.778	4.33932	1	99%
Rep	20210603D046	19XKRW03-21	11408	102.409	386.821	2691.27	0.81562	0.0491977	0.00068595	0.23439	0.00380989	0.0342897	0.000368671	0.661457	0.0103653	0.000218832	6.75482	1	166.75	33.33	213.816	3.13731	217.34	2.30081	208.427	4.37772	1	98%
Rep	20210603D047	19XKRW03-22	11056	92.8416	401.627	2448.05	1.39049	0.0513767	0.000711257	0.239891	0.00365087	0.0335981	0.000297277	0.581385	0.0112753	0.000233549	6.38757	1	257.47	33.33	218.331	2.99349	213.028	1.85764	226.624	4.66791	1	97%
Rep	20210603D048	19XKRW03-23	10588	90.2106	401.37	2389.37	0.923231	0.0491082	0.000700267	0.228991	0.00348776	0.0336168	0.000322442	0.629748	0.0102473	0.000222609	5.8914	1	153.79	33.33	209.366	2.88507	213.145	2.01428	206.067	4.45379	1	98%
Rep	20210603D049	19XKRW03-24	10848	107.785	493.548	2836.01	1.3809	0.0506918	0.000746451	0.235844	0.00379354	0.0334843	0.000304066	0.564555	0.010751	0.000224073	5.67447	1	233.4	35.1775	215.011	3.12024	212.318	1.90009	216.142	4.48084	1	98%
19CL05-6
Rep	20210604B047	19CL05-6-02	12044	52.2829	62.3631	1463.01	0.256604	0.049105	0.000828791	0.221758	0.00398292	0.0326068	0.000312683	0.533917	0.0113206	0.000385886	25.2772	1	153.79	34.255	203.372	3.31303	206.843	1.95523	227.528	7.71232	1	98%
Rep	20210604B048	19CL05-6-03	9624	22.9135	67.378	250.042	1.38781	0.0696053	0.00224427	0.741332	0.0207931	0.0830698	0.00242159	1.03932	0.0531918	0.00453271	5.26027	1	916.665	66.67	563.183	12.1306	514.42	14.4159	1047.51	86.9891	1	90%
Rep	20210604B049	19CL05-6-04	11691	61.9968	156.752	374.709	0.976499	0.0932856	0.00156528	1.47215	0.0350259	0.112153	0.0017456	0.654176	0.071948	0.00138789	3.02757	1	1494.44	31.7875	919.011	14.3997	685.242	10.1248	1404.3	26.1694	1	70%
Rep	20210604B054	19CL05-6-05	12519	66.0637	81.9673	1842.23	0.594331	0.0487253	0.000796958	0.219946	0.0038875	0.0326102	0.000313918	0.544638	0.0108036	0.000335779	22.3569	1	200.075	38.885	201.865	3.23855	206.864	1.96292	217.194	6.71431	1	97%
Rep	20210604B055	19CL05-6-06	10989	74.9751	124.921	2082.39	0.0469439	0.0487587	0.000720821	0.217511	0.00365293	0.0321665	0.000292328	0.541136	0.011431	0.00031998	16.6758	1	200.075	35.1825	199.836	3.04951	204.093	1.82906	229.736	6.39441	1	97%
Rep	20210604B056	19CL05-6-07	10866	40.7362	262.579	245.427	0	0.0622088	0.00115389	0.970721	0.0194908	0.112823	0.00123852	0.546728	0.0381278	0.00072411	0.948878	1	681.18	38.885	688.835	10.0532	689.122	7.18421	756.32	14.0983	1	99%
Rep	20210604B057	19CL05-6-08	12200	35.8436	58.5045	1011.26	0	0.0491495	0.000897713	0.224968	0.0046556	0.0330872	0.000416026	0.607582	0.0117389	0.00055744	19.6231	1	153.79	37.96	206.036	3.86159	209.841	2.59845	235.887	11.1364	1	98%
Rep	20210604B058	19CL05-6-09	9719	43.2464	168.186	397.334	0.214182	0.0578328	0.000943737	0.700649	0.0127035	0.0875208	0.000968989	0.610641	0.0255201	0.000511971	2.99645	1	524.11	39.81	539.179	7.59354	540.858	5.75122	509.346	10.0906	1	99%
Rep	20210604B059	19CL05-6-10	15299	61.7575	46.8438	1673.36	0	0.0502516	0.000808599	0.227706	0.00370659	0.0327065	0.000306113	0.574973	0.0213406	0.00076807	36.9103	1	205.63	37.03	208.303	3.06883	207.465	1.91412	426.802	15.2	1	99%
Rep	20210604B060	19CL05-6-11	11357	76.4936	195.62	2093.69	0.884817	0.0493838	0.000746128	0.218891	0.00345988	0.031925	0.000246907	0.489293	0.0102212	0.000240656	11.0587	1	164.9	39.8075	200.986	2.88546	202.585	1.5463	205.544	4.81498	1	99%
Rep	20210604B061	19CL05-6-12	12170	81.409	247.955	443.505	2.36597	0.0754111	0.00127577	1.42828	0.029095	0.136707	0.00222765	0.799931	0.0499547	0.00106046	1.776	1	1079.63	33.3325	900.831	12.1815	826.014	12.6412	985.286	20.4145	1	91%
Rep	20210604B064	19CL05-6-13	11726	29.5531	71.764	306.059	0.366324	0.0592652	0.00128009	0.658996	0.0148065	0.0802818	0.00101037	0.560137	0.0275917	0.000807381	4.20335	1	575.96	52.7675	514	9.06901	497.805	6.03524	550.135	15.8808	1	96%
Rep	20210604B066	19CL05-6-15	10695	53.4972	102.209	1464.96	1.25571	0.0507494	0.000838389	0.224508	0.00376007	0.0319048	0.000278235	0.520705	0.0101446	0.000312833	14.0334	1	227.845	71.285	205.655	3.12105	202.459	1.7416	204.012	6.25954	1	98%
Rep	20210604B067	19CL05-6-16	12795	44.9391	67.3548	1253.15	0.656905	0.0498389	0.000839966	0.223626	0.00407487	0.0323192	0.000302156	0.513074	0.0103913	0.000341247	18.1754	1	187.12	43.51	204.923	3.38426	205.047	1.89009	208.948	6.82642	1	99%
Rep	20210604B068	19CL05-6-17	8956	126.484	272.238	308.472	0	0.121177	0.00155846	4.65466	0.0747383	0.276522	0.00330188	0.743664	0.0835017	0.00149528	1.11528	1	1973.77	23.92	1759.13	13.4736	1573.82	16.6961	1620.98	27.8937	1	88%
Rep	20210604B069	19CL05-6-18	9089	79.9462	88.8444	137.813	0.164025	0.166559	0.0019186	9.38723	0.11943	0.405585	0.00313793	0.608113	0.1152	0.00192355	1.50109	1	2523.14	18.3625	2376.58	11.786	2194.7	14.4401	2203.81	34.8629	1	92%
Rep	20210604B070	19CL05-6-19	10717	97.2803	188.98	2714.53	0.323896	0.04969	0.000650068	0.223277	0.00355548	0.0323042	0.000325788	0.633316	0.010889	0.000275245	14.9799	1	188.97	29.6225	204.633	2.95451	204.954	2.03745	218.902	5.50338	1	99%
Rep	20210604B071	19CL05-6-20	10704	76.4846	125.78	2075.45	0.0364883	0.0483792	0.000700378	0.217698	0.00346869	0.0324348	0.000317149	0.613679	0.0104954	0.00025936	16.0924	1	116.755	33.33	199.992	2.89558	205.769	1.98336	211.03	5.18779	1	97%
Rep	20210604B076	19CL05-6-21	10765	85.9885	147.453	2374.89	0	0.0503978	0.00078123	0.223859	0.00357595	0.032021	0.000295823	0.578335	0.0103822	0.000266745	15.7107	1	213.035	39.805	205.116	2.97009	203.185	1.85108	208.765	5.33611	1	99%
Rep	20210604B077	19CL05-6-22	13433	33.8421	134.503	209.202	0.624208	0.067557	0.0016517	1.11495	0.0280153	0.118984	0.00159396	0.533153	0.0379687	0.000836348	1.52602	1	855.24	51.0825	760.555	13.46	724.712	9.19108	753.222	16.2861	1	95%
Rep	20210604B078	19CL05-6-23	10727	104.631	227.218	2818.34	0.570479	0.050636	0.000679124	0.225316	0.00323483	0.0320167	0.00027627	0.601033	0.0105193	0.000219185	12.2452	1	233.4	29.6225	206.325	2.68427	203.158	1.72918	211.508	4.3841	1	98%
Rep	20210604B079	19CL05-6-24	11410	77.016	109.261	2150.62	0.146868	0.0499436	0.000656587	0.225167	0.00332044	0.0324285	0.000305432	0.638703	0.0106793	0.000322949	19.7786	1	190.82	36.1025	206.201	2.75545	205.729	1.91033	214.708	6.45854	1	99%
Rep	20210604B080	19CL05-6-25	7894	14.9037	96.6637	76.6478	0	0.0665445	0.00167238	1.17686	0.0306348	0.127623	0.00130236	0.392021	0.0397553	0.000772579	0.781182	1	833.33	52.9325	789.849	14.2995	774.293	7.45708	787.983	15.0185	1	98%
Rep	20210604B081	19CL05-6-26	10694	47.9649	96.6097	1345.77	0.335871	0.0505309	0.000819529	0.229727	0.00408632	0.0327001	0.00034931	0.600541	0.0108016	0.000339561	13.5599	1	220.44	34.25	209.974	3.37708	207.425	2.18337	217.154	6.78994	1	98%
Rep	20210604B082	19CL05-6-27	12729	68.8635	121.901	388.295	0	0.0719778	0.00126663	1.42816	0.0247687	0.142743	0.00159709	0.645132	0.0440294	0.000998494	3.1732	1	987.04	35.1875	900.78	10.3756	860.153	9.02142	870.898	19.3307	1	95%
Rep	20210604B083	19CL05-6-28	12328	67.0725	143.685	747.854	0.783082	0.0575717	0.000990275	0.618717	0.013833	0.077244	0.00133812	0.77483	0.025905	0.000679399	5.16318	1	522.26	37.0325	489.043	8.6835	479.651	8.01174	516.93	13.3854	1	98%
19CL01-4
Rep	20210604B086	19CL01-4-01	11986	33.0128	31.5262	932.521	0.0893925	0.0513384	0.0010002	0.227275	0.00438003	0.0318333	0.000297609	0.485108	0.01051	0.000505851	29.7185	1	257.47	46.29	207.947	3.62657	202.012	1.86252	211.321	10.118	1	97%
Rep	20210604B087	19CL01-4-02	10800	19.765	105.387	236.482	1.10736	0.0564739	0.00165276	0.517968	0.0155477	0.0658756	0.000867209	0.438567	0.0214199	0.000599769	2.26653	1	472.265	97.21	423.793	10.404	411.26	5.24958	428.373	11.8685	1	96%
Rep	20210604B088	19CL01-4-03	6841	5.75414	9.80001	158.89	0	0.0516614	0.00346209	0.226494	0.0134651	0.0317694	0.000759933	0.402359	0.0167461	0.00244636	16.5042	1	333.39	153.683	207.301	11.1483	201.613	4.74925	335.674	48.632	1	97%
Rep	20210604B089	19CL01-4-04	10656	30.5913	119.149	220.137	0.459971	0.0636432	0.00125607	0.931636	0.0179567	0.105377	0.000970542	0.477846	0.03854	0.000842557	1.88356	1	731.49	42.5875	668.495	9.45008	645.842	5.67081	764.342	16.398	1	96%
Rep	20210604B090	19CL01-4-05	10779	25.5611	201.903	215.397	0.590445	0.0582822	0.00154943	0.677977	0.0164758	0.0842045	0.00117162	0.572558	0.0266932	0.000603992	1.06747	1	538.925	59.25	525.551	9.9763	521.17	6.97185	532.453	11.8906	1	99%
Rep	20210604B091	19CL01-4-06	10975	133.466	331.529	3727.06	5.40657	0.0610616	0.00151156	0.274134	0.0100621	0.0317115	0.000502302	0.431539	0.0198659	0.00189427	11.6072	1	642.61	53.695	245.993	8.02046	201.251	3.1404	397.597	37.5416	1	79%
Rep	20210604B092	19CL01-4-07	14274	95.1355	130.089	951.487	0	0.0602467	0.000986233	0.725444	0.0130249	0.0865572	0.00102103	0.656998	0.034231	0.000728471	7.22965	1	612.98	39.805	553.876	7.6741	535.143	6.06452	680.306	14.2367	1	96%
Rep	20210604B093	19CL01-4-08	10339	95.2334	242.002	2585.46	0.754698	0.0509529	0.000678674	0.233571	0.00354383	0.0328916	0.000301721	0.604596	0.0110184	0.000255966	10.6621	1	238.955	62.03	213.142	2.92062	208.621	1.88645	221.489	5.11726	1	97%
Rep	20210604C010	19CL01-4-09	11644	69.0594	200.339	751.042	0.178751	0.0576053	0.000982711	0.623798	0.0113353	0.0781737	0.000691135	0.486535	0.0252688	0.000563032	3.83167	1	522.26	37.0325	492.225	7.09601	485.213	4.14061	504.393	11.0997	1	98%
Rep	20210604C011	19CL01-4-10	9260	56.9021	841.186	388.423	0	0.0583477	0.00112342	0.645272	0.012518	0.0800239	0.000681167	0.438773	0.0263778	0.000450178	0.456453	1	542.63	40.735	505.565	7.73318	496.266	4.07455	526.244	8.86525	1	98%
Rep	20210604C012	19CL01-4-11	11564	68.7934	95.4628	1921.12	0.17261	0.050265	0.000781155	0.228847	0.0041247	0.0328922	0.000330079	0.556771	0.0135714	0.000471904	20.1167	1	205.63	35.1775	209.246	3.41116	208.624	2.06314	272.464	9.41053	1	99%
Rep	20210604C013	19CL01-4-12	13828	63.4618	110.42	382.147	0.674719	0.0723086	0.0013759	1.40489	0.0485028	0.139677	0.00332253	0.688998	0.0468402	0.00156193	3.37959	1	994.445	38.895	891.002	20.4877	842.837	18.7989	925.24	30.1574	1	94%
Rep	20210604C014	19CL01-4-13	13742	21.177	74.2801	547.565	0	0.0526494	0.00238538	0.241324	0.0114481	0.0331659	0.000482748	0.30683	0.0173366	0.000842638	7.24102	1	322.28	103.69	219.504	9.36552	210.332	3.01423	347.408	16.7414	1	95%
Rep	20210604C015	19CL01-4-14	11218	51.6592	81.6802	1461.77	0.482791	0.0495303	0.000876627	0.225797	0.00447622	0.0330103	0.000353951	0.540878	0.0100629	0.000441756	17.3433	1	172.305	40.7325	206.723	3.71052	209.362	2.21169	202.377	8.83992	1	98%
Rep	20210604C016	19CL01-4-15	9974	74.5312	158.112	98.4282	0	0.197443	0.00283719	12.1888	0.201653	0.447093	0.00459906	0.621765	0.124228	0.00219266	0.605695	1	2805.25	22.6825	2619.05	15.6267	2382.32	20.5279	2366.78	39.4214	1	90%
Rep	20210604C017	19CL01-4-16	12881	23.2004	26.9228	659.772	0.428018	0.0498711	0.00125204	0.224103	0.00575646	0.0327268	0.000384228	0.457065	0.0113076	0.000602269	23.9673	1	190.82	63.8775	205.319	4.77697	207.592	2.40102	227.269	12.0371	1	98%
Rep	20210604C021	19CL01-4-18	11635	91.0701	200.565	2551.18	0	0.0507494	0.000794395	0.230793	0.00429716	0.0328831	0.000326815	0.533788	0.0106756	0.00031035	12.8902	1	227.845	35.1775	210.853	3.54798	208.568	2.04282	214.635	6.20661	1	98%
Rep	20210604C022	19CL01-4-19	11593	41.3453	91.2495	219.815	0.637335	0.0697266	0.00148252	1.46883	0.0329338	0.152816	0.00170476	0.497538	0.045287	0.000977289	2.34605	1	920.37	44.4425	917.648	13.5594	916.727	9.54569	895.229	18.8974	1	99%
Rep	20210604C023	19CL01-4-20	12676	239.346	110.165	1083.65	0.264341	0.109334	0.00528721	3.05872	0.14786	0.201727	0.00501889	0.514675	0.0622297	0.00170073	9.4462	1	1788.58	87.81	1422.42	37.0033	1184.59	26.9304	1220.22	32.3617	1	81%
Rep	20210604C024	19CL01-4-21	12003	93.1483	103.118	2644.31	0	0.0497688	0.00073682	0.22386	0.00351118	0.0325884	0.000272186	0.532507	0.0103068	0.00032522	26.0159	1	183.415	33.3275	205.117	2.91641	206.728	1.70291	207.256	6.50635	1	99%
Rep	20210604C025	19CL01-4-22	10628	62.3691	310.025	390.158	0.247787	0.0653501	0.0011015	1.07079	0.0200981	0.118504	0.00110128	0.495124	0.0368985	0.000645332	1.22675	1	787.04	35.1825	739.128	9.86764	721.946	6.3591	732.371	12.5794	1	97%
Rep	20210604C026	19CL01-4-23	9671	24.014	93.6261	149.018	0.373944	0.0660016	0.0015668	1.16032	0.0291763	0.128123	0.0017403	0.540186	0.0395877	0.000947683	1.55245	1	805.555	44.285	782.105	13.7236	777.148	9.9534	784.723	18.4254	1	99%
Rep	20210604C027	19CL01-4-24	11203	154.589	263.95	4272.29	0.819118	0.0495832	0.000706855	0.225734	0.00366018	0.0329266	0.000314107	0.588335	0.0109106	0.000264122	15.7392	1	176.01	33.325	206.671	3.0353	208.839	1.96356	219.333	5.28088	1	98%
19CL05-3
Rep	20220728F86	19CL05-3@1	10842	61.9589	163.349	1802.72	0.679485	0.0501663	0.000835854	0.230965	0.00414648	0.0333359	0.000238334	0.398237	0.0101944	0.000344877	11.1738	1	211.185	38.88	210.995	3.42331	211.393	1.49121	205.007	6.90038	1	99%
Rep	20220728F87	19CL05-3@2	10817	96.5074	236.649	2777.27	2.13231	0.0499799	0.000722642	0.234319	0.00389845	0.0339604	0.000313201	0.554328	0.0100629	0.000399457	11.8315	1	194.525	30.5475	213.758	3.21026	215.287	1.95617	202.376	7.99348	1	99%
Rep	20220728F88	19CL05-3@3	11866	43.524	187.093	1342.11	-7.42931e-16	0.0545603	0.001085	0.233215	0.00439784	0.0310036	0.000243433	0.416373	0.00970128	0.000396542	7.24191	1	394.495	44.44	212.849	3.62391	196.826	1.52578	195.139	7.93798	1	92%
Rep	20220728F89	19CL05-3@4	12896	164.727	141.796	4768.08	3.02489	0.0524681	0.000812044	0.246211	0.00403805	0.0340225	0.000330933	0.593074	0.017138	0.000868963	34.3073	1	305.615	2.7775	223.494	3.29362	215.675	2.06642	343.461	17.2677	1	96%
Rep	20220728F90	19CL05-3@5	10808	34.2013	47.9357	318.58	0.0651209	0.0631716	0.00119305	0.893302	0.023347	0.102359	0.00184479	0.689586	0.0323021	0.00136811	6.73001	1	722.23	40.7375	648.142	12.5288	628.218	10.7933	642.575	26.7873	1	96%
Rep	20220728F97	19CL05-3@7	10370	136.725	436.7	3882.95	2.22276	0.0528992	0.000904669	0.24604	0.00468955	0.0336797	0.000241912	0.376846	0.0113018	0.000561529	9.01069	1	324.13	38.885	223.354	3.82448	213.537	1.51306	227.153	11.2229	1	95%
Rep	20220728F98	19CL05-3@8	10988	36.0188	84.2475	334.486	0.678953	0.0616364	0.00127293	0.845249	0.0185656	0.0994277	0.000972705	0.4454	0.0298293	0.000967609	3.97018	1	661.125	44.44	622.038	10.2248	611.054	5.71292	594.1	18.991	1	98%
Rep	20220728F99	19CL05-3@9	10681	103.666	279.627	2982.59	0	0.0506385	0.000880358	0.236486	0.00448627	0.0338735	0.000401028	0.624072	0.00989706	0.00032633	10.767	1	233.4	40.7325	215.539	3.68697	214.746	2.50318	199.058	6.53122	1	99%
Rep	20220728F100	19CL05-3@10	14471	61.8272	39.2258	1836.33	0	0.0489327	0.000873918	0.225447	0.00418123	0.0334005	0.000263398	0.425208	0.00971567	0.000599311	47.6583	1	146.38	42.59	206.433	3.46733	211.795	1.64707	195.427	11.9969	1	97%
Rep	20220728F101	19CL05-3@11	10807	68.1261	163.233	1988.88	1.87233	0.0515314	0.000989425	0.234971	0.00450657	0.0330726	0.000268162	0.422762	0.0109695	0.000553889	12.319	1	264.88	44.44	214.294	3.70813	209.75	1.67717	220.511	11.0739	1	97%
Rep	20220728F102	19CL05-3@12	12941	168.009	183.057	4838.12	1.54935	0.0507666	0.000827857	0.238222	0.00424145	0.0339979	0.00026877	0.444014	0.0112239	0.000445113	28.0293	1	231.55	71.285	216.963	3.48125	215.521	1.67967	225.596	8.89687	1	99%
Rep	20220728F103	19CL05-3@13	11124	90.2511	239.306	2614.87	0.92225	0.0530657	0.00110796	0.243671	0.00554083	0.0332722	0.000335486	0.443427	0.0104079	0.000385083	11.0081	1	331.54	52.7725	221.422	4.52626	210.995	2.09614	209.28	7.70321	1	95%
Rep	20220728F104	19CL05-3@14	11130	52.7211	108.309	1552.1	0.829983	0.0497029	0.000952121	0.228265	0.00476113	0.0333168	0.000393938	0.566886	0.00999695	0.000507635	14.5237	1	188.97	16.6625	208.766	3.93849	211.273	2.46026	201.057	10.1589	1	98%
Rep	20220728F110	19CL05-3@15	10912	83.392	199.87	2376.24	0	0.0501183	0.000892673	0.233995	0.00441856	0.0338365	0.000245508	0.384241	0.00996327	0.000376919	12.1197	1	211.185	37.955	213.491	3.63868	214.515	1.53522	200.383	7.54322	1	99%
Rep	20220728F111	19CL05-3@16	10477	43.2475	93.8483	1271.52	0	0.0500106	0.00104083	0.226717	0.00453808	0.0329239	0.000284256	0.431331	0.0108426	0.000507028	13.6648	1	194.525	48.14	207.485	3.75893	208.822	1.77761	217.973	10.1382	1	99%
Rep	20220728F112	19CL05-3@17	10784	99.4094	264.1	2844.76	0	0.0500379	0.000845944	0.231622	0.00429272	0.0335483	0.000285865	0.459767	0.0101673	0.000300009	10.94	1	198.23	34.25	211.536	3.54196	212.717	1.78669	204.467	6.00283	1	99%
Rep	20220728F113	19CL05-3@18	12927	179.917	164.144	5180.24	2.51866	0.0493651	0.000724588	0.231565	0.00413433	0.0339971	0.000357536	0.589042	0.0111813	0.000461429	31.888	1	164.9	33.33	211.49	3.41165	215.516	2.23208	224.746	9.22337	1	98%
Rep	20220728F114	19CL05-3@19	10432	56.4527	157.882	1640.45	0.28819	0.0497984	0.00104062	0.225733	0.00448516	0.0328965	0.000217121	0.332177	0.010071	0.000420036	10.4731	1	187.12	17.5875	206.67	3.71811	208.651	1.35975	202.539	8.40522	1	99%
Rep	20220728F115	19CL05-3@20	11085	104.371	334.929	2973.73	0	0.0493665	0.00100588	0.228796	0.0056435	0.0335919	0.000446507	0.538883	0.0106731	0.000453336	9.01793	1	164.9	48.14	209.205	4.66553	212.99	2.7872	214.583	9.06616	1	98%
Rep	20220728F116	19CL05-3@21	10484	55.4288	165.853	1619.5	0	0.0495482	0.000939194	0.224563	0.00483889	0.0328431	0.000311918	0.440746	0.0104947	0.000421531	9.85178	1	172.305	44.4375	205.7	4.01475	208.318	1.95006	211.016	8.4316	1	98%
Rep	20220728F117	19CL05-3@22	10653	129.475	418.389	3671.89	0	0.0508934	0.000902438	0.236243	0.00423679	0.0337046	0.000321919	0.532572	0.0104564	0.000318044	8.84065	1	235.25	40.7325	215.339	3.48295	213.692	2.01087	210.249	6.36186	1	99%
Rep	20220728F123	19CL05-3@23	10521	82.3953	194.503	2358	0	0.0506726	0.000935863	0.235216	0.00455251	0.0336424	0.000236538	0.363269	0.0101938	0.000420165	12.2124	1	233.4	74.9875	214.495	3.74513	213.305	1.47968	204.996	8.40678	1	99%
Rep	20220728F124	19CL05-3@24	10151	148.562	526.153	4148.67	0	0.0520298	0.000859961	0.243368	0.00381869	0.0339416	0.000278914	0.523705	0.0115904	0.000394425	8.00665	1	287.1	34.255	221.175	3.12211	215.17	1.74285	232.921	7.88088	1	97%
Rep	20220728F125	19CL05-3@25	11615	89.7042	165.139	2551.99	1.73105	0.0529027	0.00114861	0.24644	0.00474424	0.0338579	0.000421067	0.646007	0.0116757	0.000569904	15.828	1	324.13	48.1425	223.681	3.86778	214.648	2.62804	234.624	11.3861	1	95%

## Sheet: Coltan U-Pb dating
Table S1-2
Coltan U-Pb dating of Caolong pegmatites
				PbTotal	232Th	238U	PbCommon	207Pb/206Pb	207Pb/206Pb	207Pb/235U	207Pb/235U	206Pb/238U	206Pb/238U		208Pb/232Th	208Pb/232Th	238U/232Th		207Pb/206Pb	207Pb/206Pb	207Pb/235U	207Pb/235U	206Pb/238U	206Pb/238U	208Pb/232Th	208Pb/232Th	238U/232Th
				ppm	ppm	ppm	ppm	Ratio	1sigma	Ratio	1sigma	Ratio	1sigma	rho	Ratio	1sigma	Ratio		Age (Ma)	1sigma	Age (Ma)	1sigma	Age (Ma)	1sigma	Age (Ma)	1sigma		Concordance
19CL01-2
Rep	20201013CGMA9	19CL01-2-1		7.03282	1.10694	217.422	0.627138	0.0525058	0.0012799	0.238181	0.00654856	0.0330459	0.000474583	0.522343	0	0	0	1	309.32	55.55	216.93	5.37224	209.583	2.96366			1	96%
Rep	20201013CGMA10	19CL01-2-2		2.824	0.588973	92.6943	1.32587	0.0511659	0.00214411	0.218519	0.009301	0.0316379	0.000577466	0.428823	0	0	0	1	255.62	96.2825	200.677	7.75166	200.791	3.61005			1	99%
Rep	20201013CGMA11	19CL01-2-3		13.771	4.8079	448.077	1.00405	0.0519511	0.000845382	0.227147	0.00495595	0.031684	0.000468181	0.677259	0	0	0	1	283.395	32.405	207.841	4.10316	201.079	2.92742			1	96%
Rep	20201013CGMA13	19CL01-2-5		4.10248	0.973663	133.598	0.688504	0.0528605	0.00160154	0.22813	0.00689841	0.031693	0.000480978	0.501874	0	0	0	1	324.13	68.51	208.654	5.70518	201.136	3.0073			1	96%
Rep	20201013CGMA14	19CL01-2-6		12.5405	1.86517	393.584	1.54885	0.0509866	0.00117491	0.229264	0.00719846	0.0327462	0.000841936	0.818869	0	0	0	1	238.955	56.47	209.591	5.9477	207.713	5.25657			1	99%
Rep	20201013CGMA15	19CL01-2-7		3.76924	0.947987	122.562	1.26	0.050263	0.00174106	0.220022	0.00809137	0.0317579	0.000508453	0.435354	0	0	0	1	205.63	81.47	201.928	6.73557	201.541	3.17867			1	99%
Rep	20201013CGMA24	19CL01-2-8		18.9215	4.64346	596.379	0.852162	0.0518717	0.000969174	0.232631	0.00525909	0.0326813	0.000613092	0.829817	0	0	0	1	279.69	42.59	212.368	4.3346	207.308	3.8288			1	97%
Rep	20201013CGMA25	19CL01-2-9		4.09459	1.35647	130.19	0.779874	0.0523674	0.00167996	0.238648	0.00874814	0.0331943	0.000649059	0.533412	0	0	0	1	301.91	69.4375	217.313	7.17282	210.509	4.05127			1	96%
Rep	20201013CGMA26	19CL01-2-10		4.33693	0.876572	136.508	0.263005	0.0524	0.00201812	0.2346	0.00900207	0.032696	0.00049907	0.397787	0	0	0	1	301.91	87.0275	213.989	7.40509	207.4	3.11736			1	96%
Rep	20201013CGMA28	19CL01-2-12		4.36166	0.801198	139.597	0.873412	0.0545035	0.00162143	0.240681	0.00724433	0.0323977	0.000483622	0.495947	0	0	0	1	390.79	66.66	218.978	5.93069	205.537	3.02183			1	93%
Rep	20201013CGMA29	19CL01-2-13		19.8855	2.96524	621.98	0.773594	0.0539368	0.000982369	0.242622	0.00619459	0.0325952	0.000581226	0.698408	0	0	0	1	368.57	40.7375	220.566	5.064	206.771	3.63027			1	93%
Rep	20201013CGMA39	19CL01-2-15		3.19248	0.664236	105.481	0.652911	0.0561542	0.00187673	0.247952	0.00883649	0.0322697	0.000540795	0.470246	0	0	0	1	457.45	74.0675	224.911	7.19134	204.738	3.37902			1	90%
Rep	20201013CGMA40	19CL01-2-16		3.31147	0.549705	105.067	0.468492	0.0479428	0.00157828	0.218141	0.00730918	0.0332431	0.000520315	0.467126	0	0	0	1	98.24	77.77	200.362	6.0941	210.814	3.24825			1	94%
Rep	20201013CGMA43	19CL01-2-19		4.74929	0.923682	155.651	0.579028	0.0522497	0.0015273	0.228701	0.00668618	0.0319741	0.000458769	0.49078	0	0	0	1	294.505	66.66	209.126	5.52721	202.891	2.86788			1	96%
Rep	20201013CGMA44	19CL01-2-20		4.91256	0.79369	152.23	0.782289	0.05578	0.00193529	0.253024	0.00880929	0.0330877	0.00051023	0.442916	0	0	0	1	442.64	77.77	229.03	7.14027	209.844	3.18583			1	91%
Rep	20201013CGMA45	19CL01-2-21		8.07505	1.07488	261.122	0.412403	0.052874	0.0013829	0.231289	0.00594446	0.0318689	0.000422223	0.515486	0	0	0	1	324.13	63.8825	211.262	4.90421	202.234	2.64002			1	95%
Rep	20201013CGMA46	19CL01-2-22		3.15874	0.51558	100.276	0.917513	0.0563348	0.00189177	0.249654	0.00828452	0.0326007	0.000558991	0.516713	0	0	0	1	464.86	74.0675	226.295	6.73319	206.805	3.4915			1	90%
Rep	20201013CGMA56	19CL01-2-24		8.8041	1.16594	272.971	0.457349	0.0490986	0.00106894	0.22343	0.00567058	0.0329242	0.000491821	0.58858	0	0	0	1	153.79	54.6225	204.76	4.70834	208.824	3.0715			1	98%
Rep	20201013CGMA57	19CL01-2-25		4.13478	0.698824	131.698	0.384302	0.0504705	0.00151266	0.221463	0.00684968	0.0320977	0.000561073	0.565168	0	0	0	1	216.74	68.5075	203.127	5.69571	203.663	3.50615			1	99%
Rep	20201013CGMA59	19CL01-2-27		3.71911	0.872278	118.806	1.13703	0.052753	0.00171238	0.229139	0.00744329	0.0321152	0.000535082	0.512915	0	0	0	1	316.725	74.065	209.488	6.1505	203.773	3.34384			1	97%
Rep	20201013CGMA60	19CL01-2-28		5.57796	2.02425	176.701	0.774328	0.0528232	0.00149111	0.232433	0.00673292	0.0320613	0.000434508	0.467854	0	0	0	1	320.43	62.9575	212.205	5.54903	203.436	2.71623			1	95%
Rep	20201013CGMA61	19CL01-2-29		4.19446	0.76173	134.398	0.993195	0.0486153	0.00136305	0.212868	0.00650213	0.0317103	0.000419462	0.433061	0	0	0	1	127.865	66.66	195.957	5.44505	201.243	2.62317			1	97%
Rep	20201013CGMA62	19CL01-2-30		8.34634	1.28598	253.024	1.17346	0.0540485	0.00147044	0.245312	0.00710338	0.0331057	0.000540022	0.563329	0	0	0	1	372.275	61.105	222.761	5.79383	209.956	3.37156			1	94%
19CL02-1
Rep	20201023CGMC9	19CL02-1-1		5.83552	0.502134	178.379	0	0.0509759	0.00159636	0.227616	0.00737804	0.0325343	0.000486433	0.461257	0	0	0	1	238.955	72.21	208.229	6.10415	206.39	3.03899			1	99%
Rep	20201023CGMC11	19CL02-1-3		9.69597	1.03369	295.007	0.112309	0.0503989	0.00112389	0.223941	0.00508435	0.0324534	0.000440443	0.597761	0	0	0	1	213.035	51.8425	205.184	4.22029	205.885	2.75228			1	99%
Rep	20201023CGMC12	19CL02-1-4		7.53771	0.781581	230.177	0.187864	0.0510827	0.00141901	0.224881	0.00645316	0.0321599	0.000452779	0.490628	0	0	0	1	255.62	58.3225	205.964	5.35128	204.052	2.83001			1	99%
Rep	20201023CGMC14	19CL02-1-6		6.21223	0.683696	188.746	0.251848	0.0513855	0.00189135	0.226386	0.0078127	0.032487	0.000487737	0.435035	0	0	0	1	257.47	83.32	207.211	6.47004	206.095	3.04726			1	99%
Rep	20201023CGMC15	19CL02-1-7		2.93776	0.420877	88.607	1.14536	0.0519676	0.0022564	0.227012	0.00930462	0.0324681	0.000624655	0.46939	0	0	0	1	283.395	99.985	207.729	7.7011	205.977	3.90174			1	99%
Rep	20201023CGMC24	19CL02-1-8		4.38651	0.310627	129.137	0	0.0542928	0.00207221	0.237186	0.00861437	0.0323641	0.000558315	0.474986	0	0	0	1	383.385	91.6575	216.113	7.07151	205.327	3.48806			1	94%
Rep	20201023CGMC25	19CL02-1-9		4.38118	0.482171	129.524	0.914463	0.052535	0.00258438	0.231354	0.0118823	0.0325916	0.000975046	0.582499	0	0	0	1	309.32	111.095	211.315	9.79928	206.748	6.08819			1	97%
Rep	20201023CGMC26	19CL02-1-10		16.9713	2.78742	525.719	0.268278	0.0503971	0.000951556	0.215594	0.00484831	0.031053	0.000399739	0.572425	0	0	0	1	213.035	44.435	198.236	4.05203	197.135	2.50154			1	99%
Rep	20201023CGMC27	19CL02-1-11		4.15271	0.330042	128.933	0	0.0508537	0.00181133	0.217936	0.00784883	0.0316092	0.000561475	0.493221	0	0	0	1	235.25	86.0975	200.191	6.54492	200.612	3.51027			1	99%
Rep	20201023CGMC28	19CL02-1-12		12.3003	1.45132	375.122	0.339547	0.0522279	0.00111931	0.22206	0.00505967	0.0310451	0.000420578	0.594568	0	0	0	1	294.505	43.515	203.623	4.20625	197.086	2.63174			1	96%
Rep	20201023CGMC39	19CL02-1-15		8.61964	2.51291	244.192	0.455725	0.0487816	0.00134459	0.216389	0.00632479	0.032353	0.000502939	0.531849	0	0	0	1	200.075	66.6575	198.9	5.28137	205.258	3.1425			1	96%
Rep	20201023CGMC43	19CL02-1-19		4.75205	0.713912	135.493	0.62475	0.0524502	0.00242	0.227647	0.0103801	0.0323632	0.000826726	0.560232	0	0	0	1	305.615	103.688	208.254	8.58655	205.322	5.16354			1	98%
Rep	20201023CGMC55	19CL02-1-23		2.49449	0.61608	74.8015	0.864302	0.0529989	0.00246487	0.226219	0.0106274	0.0312417	0.00058249	0.396875	0	0	0	1	327.835	105.545	207.072	8.80127	198.315	3.64279			1	95%
Rep	20201023CGMC56	19CL02-1-24		6.35466	0.581284	190.205	0.317894	0.0513062	0.00152016	0.221886	0.00720771	0.0314249	0.000491472	0.481458	0	0	0	1	253.77	68.5075	203.479	5.99118	199.46	3.07359			1	98%
Rep	20201023CGMC57	19CL02-1-25		7.63457	0.825629	223.023	0.837461	0.0509915	0.00138143	0.22425	0.00652582	0.0322808	0.000603972	0.642939	0	0	0	1	238.955	62.95	205.441	5.41426	204.807	3.77332			1	99%
Rep	20201023CGMC58	19CL02-1-26		6.09433	0.514078	180.409	0.908631	0.0502692	0.00158827	0.215941	0.0069744	0.0315462	0.000495436	0.48626	0	0	0	1	205.63	74.06	198.526	5.8256	200.218	3.09801			1	99%
Rep	20201023CGMC60	19CL02-1-28		5.71689	0.530108	171.359	0.237603	0.0501829	0.00169188	0.215988	0.00751475	0.0313661	0.000413493	0.378899	0	0	0	1	211.185	77.765	198.565	6.27648	199.092	2.58672			1	99%
Rep	20201023CGMC61	19CL02-1-29		11.8616	1.5453	352.829	0.877808	0.0523665	0.00136955	0.224603	0.00583629	0.0313235	0.000366859	0.450719	0	0	0	1	301.91	61.105	205.733	4.8412	198.826	2.29561			1	96%
Rep	20201023CGMC62	19CL02-1-30		8.39949	0.877551	252.324	0.965215	0.0490069	0.00132785	0.210617	0.00599369	0.0313417	0.000422302	0.473477	0	0	0	1	146.38	62.9525	194.07	5.02883	198.94	2.64179			1	97%
19CL02-2
Rep	20201023CGMB15	19CL02-2-2		29.0142	13.2506	868.988	1.48079	0.0545416	0.000923932	0.243553	0.00774523	0.0322213	0.000822125	0.802333	0	0	0	1	394.495	38.885	221.326	6.32591	204.435	5.13551			1	92%
Rep	20201023CGMB16	19CL02-2-3		12.5298	5.29398	392.748	0.432282	0.0503518	0.00104788	0.216728	0.00516702	0.0313712	0.000457407	0.611568	0	0	0	1	213.035	48.1375	199.183	4.31411	199.125	2.86097			1	99%
Rep	20201023CGMB17	19CL02-2-4		25.0114	13.1964	775.302	1.42449	0.0504955	0.000730875	0.218737	0.00471414	0.0315012	0.00056098	0.826307	0	0	0	1	216.74	33.325	200.858	3.92993	199.937	3.50754			1	99%
Rep	20201023CGMB19	19CL02-2-6		102.902	108.725	3008.71	2.73522	0.0539977	0.000492929	0.241245	0.00469939	0.0324316	0.000588395	0.931364	0	0	0	1	372.275	20.3675	219.44	3.84716	205.749	3.67557			1	93%
Rep	20201023CGMB20	19CL02-2-7		41.3141	17.3131	1237.22	0.691613	0.0504836	0.000732739	0.224844	0.00593047	0.0323091	0.000722691	0.848046	0	0	0	1	216.74	33.325	205.933	4.91829	204.984	4.51431			1	99%
Rep	20201023CGMB30	19CL02-2-9		17.0184	5.53456	506.793	0.816065	0.0516487	0.00114309	0.225451	0.00691979	0.0320823	0.00086584	0.879288	0	0	0	1	333.39	51.845	206.436	5.73531	203.568	5.40918			1	98%
Rep	20201023CGMB31	19CL02-2-10		46.8336	39.3038	1435.13	1.54498	0.051539	0.000610237	0.221408	0.00428969	0.0312978	0.000552845	0.911712	0	0	0	1	264.88	30.5525	203.081	3.56878	198.665	3.45737			1	97%
Rep	20201023CGMB32	19CL02-2-11		26.1052	11.0729	792.535	1.15022	0.0513884	0.000813224	0.226876	0.00610541	0.0320692	0.000717783	0.83172	0	0	0	1	257.47	37.0325	207.616	5.05492	203.486	4.48469			1	97%
Rep	20201023CGMB33	19CL02-2-12		36.3814	15.008	1030.2	0.52281	0.0502596	0.000783312	0.223355	0.00545187	0.0323863	0.00070253	0.888695	0	0	0	1	205.63	35.1775	204.698	4.52719	205.466	4.38813			1	99%
Rep	20201023CGMB34	19CL02-2-13		21.0666	9.08189	655.184	0.237077	0.0502194	0.000773911	0.217511	0.00512547	0.0313898	0.000575248	0.777705	0	0	0	1	205.63	35.1775	199.836	4.27671	199.24	3.59704			1	99%
Rep	20201023CGMB44	19CL02-2-15		40.9041	25.0197	1256.34	0.948949	0.0505935	0.00064249	0.219398	0.00430775	0.0315053	0.000523185	0.845774	0	0	0	1	233.4	27.77	201.409	3.58964	199.963	3.27144			1	99%
Rep	20201023CGMB45	19CL02-2-16		13.1305	5.22384	407.158	1.63621	0.0512638	0.000948779	0.221856	0.00556396	0.0313424	0.000530483	0.674881	0	0	0	1	253.77	42.5875	203.453	4.62581	198.944	3.31753			1	97%
Rep	20201023CGMB46	19CL02-2-17		46.1656	46.216	1397.64	1.37286	0.0505976	0.000555116	0.223217	0.00567825	0.0320511	0.00076759	0.941453	0	0	0	1	233.4	28.695	204.584	4.71552	203.373	4.79579			1	99%
Rep	20201023CGMB49	19CL02-2-20		20.4891	9.30208	635.302	0.322241	0.0516811	0.000996047	0.226938	0.00766456	0.0318681	0.000899446	0.83568	0	0	0	1	272.285	44.44	207.668	6.34457	202.229	5.62019			1	97%
Rep	20201023CGMB50	19CL02-2-21		24.1794	12.6219	719.732	1.35694	0.0582426	0.001054	0.25894	0.00795011	0.0318919	0.000642691	0.656368	0	0	0	1	538.925	45.3625	233.812	6.41404	202.378	4.0165			1	85%
Rep	20201023CGMB51	19CL02-2-22		19.0839	8.75021	584.222	0.852838	0.0500601	0.000862587	0.222341	0.00532988	0.032258	0.000543468	0.702811	0	0	0	1	198.23	36.1025	203.856	4.42963	204.665	3.39574			1	99%
Rep	20201023CGMB61	19CL02-2-24		21.1857	11.0138	649.779	0.25161	0.0523703	0.000980022	0.233751	0.00681117	0.0324182	0.000742827	0.786377	0	0	0	1	301.91	42.59	213.291	5.6075	205.665	4.63954			1	96%
Rep	20201023CGMB62	19CL02-2-25		14.428	6.20778	460.194	0.940607	0.0528275	0.000887559	0.228576	0.00533336	0.0314095	0.000528521	0.721159	0	0	0	1	320.43	41.6625	209.023	4.41016	199.364	3.30507			1	95%
Rep	20201023CGMB63	19CL02-2-26		39.0868	24.076	1212.47	1.1132	0.0502231	0.000606096	0.224158	0.00500275	0.0323416	0.000623899	0.864368	0	0	0	1	205.63	27.77	205.365	4.1519	205.187	3.89749			1	99%
Rep	20201023CGMB64	19CL02-2-27		22.0775	14.0054	682.671	0.505356	0.0523493	0.00083865	0.22547	0.00349088	0.031399	0.000296317	0.609529	0	0	0	1	301.91	39.81	206.452	2.89583	199.298	1.85516			1	96%
Rep	20201023CGMB65	19CL02-2-28		26.675	13.303	801.225	1.79036	0.060181	0.000970397	0.264276	0.00568154	0.0319156	0.00051945	0.757064	0	0	0	1	609.28	39.805	238.107	4.56591	202.526	3.24687			1	83%

## Sheet: Cassiterite U-Pb dating
Table S1-3
Cassiterite U-Pb dating of Caolong pegmatites
Identifier	Comments	f206c	206Pb	Uppm	Th/U	206Pb/204Pb	1s%	238U/206Pb	1s%	207Pb/206Pb	1s%	208Pb/206Pb	1s%	207Pb/235U	1s%	206Pb/238U	1s%	Rho	208Pb/232Th	1s%	207Pb/206Pb	2s (abs)	2ssys (abs)	206Pb/238U	2s (abs)	2ssys (abs)	207Pb/235U	2s (abs)	2ssys (abs)	208Pb/232Th	2s (abs)	2ssys (abs)	% conc
19CL01-2
Cst19CL01-2-1	19CL01-2	32039.4	127.864	17.5902		0.880111	35.4019	1223.11	47.0651	0.1266	15.1598	26.4081	63.1718	0.545988	11.976	0.0377916	4.62957	0.103689	#N/A	#N/A	3584.67	261.214	261.214	237.439	21.6127	69.9366	319.242	71.4806	111.098	#N/A	#N/A	#N/A	6.62372
Cst19CL01-2-2	19CL01-2	-366429	86.0506	12.5721		0.29331	90.6808	-8050.25	-18.4295	-43.1186	-29.4923	-90.1524	-40.7479	1.04449	10.2795	0.037756	5.60638	0.000879675	#N/A	#N/A	4009.26	207.489	207.489	236.44	26.0951	71.2663	523.215	97.6388	166.889	#N/A	#N/A	#N/A	5.89735
Cst19CL01-2-3	19CL01-2	426.078	205.88	39.2013		1.40338	34.1575	39.3774	4.53501	0.0851404	13.4041	0.0100319	298.223	0.251429	12.0113	0.0320813	3.45131	0.0482627	#N/A	#N/A	2918.14	246.993	246.993	204.497	14.1215	59.9825	198.126	45.5691	70.7032	#N/A	#N/A	#N/A	7.00778
Cst19CL01-2-4	19CL01-2	-4491.65	180.096	38.0139		2.01929	22.1015	-184.885	-122.29	0.128668	13.2004	0.0349812	59.4055	0.427903	10.9959	0.0337638	3.88913	-0.0763463	#N/A	#N/A	3198.61	236.189	236.189	213.1	16.3102	61.9386	278.745	57.1353	93.5214	#N/A	#N/A	#N/A	6.66225
Cst19CL01-2-5	19CL01-2	108.151	914.46	209.394		6.49143	32.4869	30.526	2.45185	0.101951	6.10428	0.15362	9.41196	0.478558	5.76279	0.035367	2.20481	0.103662	#N/A	#N/A	1679.23	211.497	211.497	223.712	9.70162	63.4387	369.304	37.7121	100.585	#N/A	#N/A	#N/A	13.3223
Cst19CL01-2-6	19CL01-2	497.726	59.1739	18.9751		0.063109	357.676	-5225.58	-11.8987	1.1694	11.9467	-17.7303	-50.3542	0.292894	20.2609	0.0310543	6.60242	0.0195688	#N/A	#N/A	3973.51	324.462	324.462	197.947	26.1235	62.1321	149.919	64.5093	78.8655	#N/A	#N/A	#N/A	4.98166
Cst19CL01-2-7	19CL01-2	321.784	272.06	100.673		2.72003	25.0777	37.5842	4.8323	-0.038142	-290.393	-0.353429	-58.1263	0.348356	9.40537	0.0340419	3.5765	0.0766625	#N/A	#N/A	2454.79	201.108	201.108	214.968	15.1362	62.1693	260.031	45.3868	82.3903	#N/A	#N/A	#N/A	8.75705
Cst19CL01-2-8	19CL01-2	381.395	108.088	29.95		0.0767237	413.068	-9560.59	-25.5188	2.82668	23.3927	-251.214	-30.6901	0.65391	12.2734	0.0383613	4.92187	0.130695	#N/A	#N/A	3449.47	256.238	256.238	240.701	23.3023	71.367	375.752	85.5333	131.061	#N/A	#N/A	#N/A	6.97792
Cst19CL01-2-9	19CL01-2	604.455	85.5696	21.0566		0.398212	59.1045	-5489.46	-24.0643	3.22692	20.9908	2.28732	20.4214	0.148161	28.8149	0.0349384	4.9487	-0.0417283	#N/A	#N/A	3992.96	306.624	306.624	219.731	21.4067	65.2438	65.2394	49.7166	55.4633	#N/A	#N/A	#N/A	5.50297
Cst19CL01-2-10	19CL01-2	426.706	87.182	12.0006		0.828831	31.1563	-4805.41	-18.8248	-4.20433	-109.936	-104.512	-36.6735	1.35304	11.4759	0.0593615	5.4236	0.145155	#N/A	#N/A	3626.49	245.121	245.121	366.278	38.7959	109.052	543.254	125.224	199.641	#N/A	#N/A	#N/A	10.1001
Cst19CL01-2-11	19CL01-2	93.1875	34.1395	6.83723		0.16241	90.0706	-45126.1	-10.2453	12.3237	145.857	-42.7709	-130.848	0.0641384	95.9856	0.0342981	9.48681	-0.0462113	#N/A	#N/A	4026.78	473.475	473.475	211.689	39.5451	71.3518	-121.017	26.3553	26.6442	#N/A	#N/A	#N/A	5.25703
Cst19CL01-2-12	19CL01-2	433.662	80.0842	15.9443		0.508005	45.8709	-14500.1	-16.0559	-28.88	-47.8353	-23.3634	-100.741	0.362487	18.0534	0.0335813	5.54797	-0.0233899	#N/A	#N/A	3744.43	286.041	286.041	210.987	23.139	63.769	190.777	72.0503	91.7889	#N/A	#N/A	#N/A	5.6347
Cst19CL01-2-13	19CL01-2	1036.76	37.5368	3.52662		0.411989	38.5297	-8817.66	-11.6802	-2.04256	-181.031	-33.1834	-124.314	0.312919	33.9419	0.0437261	10.2219	0.150911	#N/A	#N/A	4534.98	235.541	235.541	268.009	53.5194	91.8102	71.7692	67.9549	73.7004	#N/A	#N/A	#N/A	5.90982
Cst19CL01-2-14	19CL01-2	147.172	623.381	21.1216		3.0483	59.2187	18.696	5.49035	0.139461	5.92115	0.210589	7.67465	1.77899	6.9272	0.0850173	4.98516	0.746755	#N/A	#N/A	2463.12	165.077	165.077	517.104	49.3279	149.358	849.638	91.8059	209.975	#N/A	#N/A	#N/A	20.9939
Cst19CL01-2-15	19CL01-2	-279752	37.5686	2.81936		0.12385	108.994	-1877.32	-9.91913	0.102851	11.8508	-1.45936	-254.954	0.0511387	54.5405	0.0368238	8.45821	0.0108822	#N/A	#N/A	2494.12	204.096	204.096	232.749	39.1502	76.6933	23.11	27.7559	28.6875	#N/A	#N/A	#N/A	9.3319
Cst19CL01-2-16	19CL01-2	423.688	176.286	10.2308		1.56147	30.3409	32.2225	4.94167	0.315143	10.3959	22.4331	81.922	1.17503	6.71863	0.0405226	3.89901	-0.00213397	#N/A	#N/A	3196.29	193.54	193.54	254.701	19.4579	73.7172	696.196	80.0011	187.586	#N/A	#N/A	#N/A	7.96863
Cst19CL01-2-17	19CL01-2	541.414	103.032	7.1345		0.54231	52.9928	-872.293	-27.6707	0.0585465	19.8452	-2.71469	-92.9583	0.241381	16.5114	0.0340339	4.8292	0.0624862	#N/A	#N/A	3498.96	305.603	305.603	214.244	20.3609	63.4278	151.639	49.5247	65.4167	#N/A	#N/A	#N/A	6.12309
Cst19CL01-2-18	19CL01-2	327.266	183.718	13.4365		0.897356	57.6083	38.0388	4.63856	0.0807568	14.2619	-0.283361	-131.576	0.259635	12.3878	0.0331382	3.8727	-0.0301411	#N/A	#N/A	3054.42	261.447	261.447	209.236	15.9903	60.9634	210.481	49.2287	75.033	#N/A	#N/A	#N/A	6.85027
Cst19CL01-2-19	19CL01-2	48.4884	1803.45	-1148.48		16.0979	25.5952	10.9617	6.44422	0.290965	4.03508	0.677679	4.42676	5.49854	6.38758	0.124867	4.66147	0.887475	#N/A	#N/A	3492.65	94.6051	94.6051	746.751	65.4178	210.378	1669.14	124.836	305.179	#N/A	#N/A	#N/A	21.3806
Cst19CL01-2-20	19CL01-2	6625.83	206.95	-75.1237		2.07854	27.1653	-70.7896	-145.393	-0.838576	-118.195	-3.56148	-110.434	0.68706	9.17456	0.040622	4.03695	0.185844	#N/A	#N/A	3038.93	232.473	232.473	257.617	20.7061	75.9559	446.509	73.6302	136.011	#N/A	#N/A	#N/A	8.47723
Cst19CL01-2-21	19CL01-2	-17202.6	384.815	-67.0101		3.68198	39.1285	29.3126	6.92564	0.123572	10.2441	0.177095	14.6767	2.1683	14.5275	0.0846136	9.61563	0.894016	#N/A	#N/A	2884.69	215.031	215.031	508.244	92.055	164.559	696.978	151.816	212.655	#N/A	#N/A	#N/A	17.6187
Cst19CL01-2-22	19CL01-2	163.261	733.533	-214.191		5.17118	35.8195	23.1695	4.21416	0.115258	9.67678	-6.9018	-76.0878	0.638306	6.09629	0.0515164	3.38184	0.0079753	#N/A	#N/A	1450.36	210.637	210.637	322.195	21.2039	91.815	462.986	47.3536	120.386	#N/A	#N/A	#N/A	22.2149
Cst19CL01-2-23	19CL01-2	201.928	306.653	-119.39		1.57635	47.513	19.3803	4.98155	0.497048	7.54741	-55.8842	-72.1075	3.61063	3.85354	0.0640893	3.18706	0.225564	#N/A	#N/A	3640.46	122.664	122.664	401.243	25.2973	115.886	1482.02	62.0114	237.536	#N/A	#N/A	#N/A	11.0218
Cst19CL01-2-24	19CL01-2	-12895.9	626.926	100.882		6.90158	25.451	-400.309	-21.6669	0.282684	7.69592	-1.72658	-97.3957	8.68716	13.7938	0.186031	12.5941	0.958543	#N/A	#N/A	3765.73	162.581	162.581	959.564	210.026	317.123	1270.49	219.484	315.562	#N/A	#N/A	#N/A	25.4815
Cst19CL01-2-25	19CL01-2	-407550	116.473	12.6444		0.241627	136.857	-1890	-26.2435	0.0979333	17.5917	-24.935	-44.4833	0.308921	15.4497	0.0339886	5.08929	0.0960606	#N/A	#N/A	2589.14	471.597	471.597	213.8	21.4298	63.7064	199.539	58.9273	80.1634	#N/A	#N/A	#N/A	8.25756
Cst19CL01-2-26	19CL01-2	275.574	240.515	4.17324		2.19299	26.2467	-77.3372	-48.0671	0.517302	6.86126	-8.5045	-48.2935	14.8151	7.59764	0.193496	6.05637	0.762974	#N/A	#N/A	4034.7	144.854	144.854	1085.96	120.959	309.202	2116.65	204.472	434.59	#N/A	#N/A	#N/A	26.9156
Cst19CL01-2-27	19CL01-2	-2997.41	230.686	21.0401		1.39468	42.7439	38.6373	4.60014	0.117516	12.1411	-1.89212	-103.451	0.343357	9.96546	0.0323211	3.52115	-0.0519774	#N/A	#N/A	2774.53	254.966	254.966	204.332	14.1977	59.177	255.855	48.1309	83.9812	#N/A	#N/A	#N/A	7.36456
Cst19CL01-2-28	19CL01-2	220.416	289.257	23.9165		1.33767	53.9808	36.0081	3.71792	0.0447642	13.0586	0.0332023	30.4181	0.205519	11.4616	0.0334007	3.22727	0.0833556	#N/A	#N/A	2167.44	249.681	249.681	211.147	13.4201	60.7481	162.445	36.4024	58.0794	#N/A	#N/A	#N/A	9.74175
Cst19CL01-2-29	19CL01-2	326.695	133.443	4.22152		0.306691	124.871	-1022.74	-27.9474	-6.20565	-58.249	-128.917	-28.0531	6.82315	6.44784	0.0891957	5.24691	0.328382	#N/A	#N/A	3808.22	163.096	163.096	546.017	55.7361	161.286	1684.87	152.636	370.241	#N/A	#N/A	#N/A	14.3379
Cst19CL01-2-30	19CL01-2	-21529.5	91.7843	6.28884		0.492211	61.8747	-613.832	-15.2836	0.231722	11.5066	-11.0959	-30.414	0.802646	12.6248	0.0381163	6.39021	0.00323083	#N/A	#N/A	3645.84	177.368	177.368	237.907	29.8378	72.912	402.259	95.0058	143.263	#N/A	#N/A	#N/A	6.52542
19CL01-6
Cst19CL01-6-1	19CL01-6	195.798	273.493	-2.06089		2.4147	27.7236	13.3874	3.91128	0.602522	4.83043	1.63098	5.5459	6.63881	3.86303	0.0897195	3.26494	0.387815	#N/A	#N/A	3890.28	139.179	139.179	549.587	34.4197	154.095	1988.89	76.1755	291.124	#N/A	#N/A	#N/A	14.1272
Cst19CL01-6-2	19CL01-6	173.282	104.684	-0.638397		0.466179	75.6204	4857.51	19.4231	44.7891	34.176	261.454	28.5844	8.68873	8.37052	0.108568	7.08224	0.640552	#N/A	#N/A	3918.6	176.978	176.978	637.494	85.0127	190.987	1657.12	198.008	390.925	#N/A	#N/A	#N/A	16.2684
Cst19CL01-6-3	19CL01-6	412.041	122.813	-2.41312		0.335696	109.475	-993.702	-32.6454	-0.430307	-161.371	-1.39033	-99.8165	0.230761	15.6941	0.0311089	4.56328	-0.0237401	#N/A	#N/A	3146.07	269.779	269.779	196.356	17.6639	57.911	154.495	48.9284	66.0867	#N/A	#N/A	#N/A	6.24132
Cst19CL01-6-4	19CL01-6	-21748.4	90.8552	-2.21167		0.488201	59.5011	-524.658	-18.2475	0.154102	13.0565	0.0422913	35.5978	0.268389	17.4747	0.0295374	5.6022	0.0961444	#N/A	#N/A	4095.22	211.61	211.61	188.673	21.1278	57.7374	166.791	58.9403	76.0515	#N/A	#N/A	#N/A	4.60715
Cst19CL01-6-5	19CL01-6	84.5614	805.921	-26.4636		5.98424	33.5207	33.0719	1.86241	0.0510955	6.41785	0.00167608	65.8951	0.205117	6.10203	0.0316792	1.94803	-0.0747936	#N/A	#N/A	554.487	198.789	198.789	200.835	7.69367	56.794	181.942	21.1009	53.6018	#N/A	#N/A	#N/A	36.22
Cst19CL01-6-6	19CL01-6	421.915	81.2534	-5.64325		0.956251	24.7305	-236.618	-20.4766	0.0698283	21.7354	-0.377437	-86.9442	0.265753	17.6195	0.0311622	5.79355	-0.0432762	#N/A	#N/A	4065.15	255.029	255.029	196.005	22.3496	59.3334	169.009	56.9437	73.2348	#N/A	#N/A	#N/A	4.82159
Cst19CL01-6-7	19CL01-6	711.243	110.141	9.68074		0.625654	52.4938	-10959.6	-53.3384	-9.77492	-60.5916	-15.835	-62.8474	0.168465	23.2263	0.0330515	5.71085	-0.0316435	#N/A	#N/A	3569.37	356.637	356.637	207.645	23.3081	62.6474	91.4033	47.8755	56.1671	#N/A	#N/A	#N/A	5.81743
Cst19CL01-6-8	19CL01-6	541.339	84.2591	7.30556		0.342019	123.3	-2080.01	-21.6065	-8.79064	-41.2495	-5.32946	-117.226	0.389112	21.3423	0.0338074	9.04028	0.00476155	#N/A	#N/A	3641.45	504.533	504.533	211.997	37.7564	70.4727	231.787	102.451	123.187	#N/A	#N/A	#N/A	5.82178
Cst19CL01-6-9	19CL01-6	177.965	254.922	13.6036		2.15088	32.2093	24.3489	5.21619	0.473948	9.19688	-4.9978	-87.4445	2.53136	4.57235	0.0532303	3.39074	0.0398423	#N/A	#N/A	3425.66	148.137	148.137	332.573	22.003	95.0377	1175.19	77.1409	252.474	#N/A	#N/A	#N/A	9.70829
Cst19CL01-6-10	19CL01-6	105.887	621.151	31.4369		6.7358	20.6651	18.5482	3.98233	0.354435	4.97598	0.875532	6.50313	3.87326	6.42832	0.0707552	4.12273	0.75073	#N/A	#N/A	3256.78	197.2	197.2	440.112	35.3473	127.166	1350.11	112.804	274.31	#N/A	#N/A	#N/A	13.5137
Cst19CL01-6-11	19CL01-6	-78214.9	129.18	11.7552		0.986426	39.4109	-970.845	-28.7219	0.0913934	15.4866	0.184815	21.5071	0.266966	15.4212	0.034802	4.61204	-0.0858439	#N/A	#N/A	3021.32	398.781	398.781	219.097	19.9281	64.7079	176.057	52.3558	71.2842	#N/A	#N/A	#N/A	7.2517
Cst19CL01-6-12	19CL01-6	412.528	80.7707	7.77383		0.429559	65.404	-1483.57	-12.551	-4.27455	-31.4367	-6.90456	-36.3148	0.701822	11.8533	0.0358821	6.77161	0.0995	#N/A	#N/A	3565.99	270.929	270.929	224.013	29.8715	69.5886	395.406	87.6609	137.074	#N/A	#N/A	#N/A	6.28193
Cst19CL01-6-13	19CL01-6	13713.9	183.439	15.7369		-0.257694	-209.957	39.874	5.14399	0.111397	12.4082	-11.4781	-75.7125	0.365401	10.9596	0.033256	3.73794	0.0943674	#N/A	#N/A	3044.22	226.537	226.537	210.029	15.4792	60.9981	270.262	55.7146	91.3858	#N/A	#N/A	#N/A	6.89926
Cst19CL01-6-15	19CL01-6	422.368	102.451	7.23761		0.509228	62.4615	54879.9	25.2386	0.392032	17.785	125.214	72.6329	0.29385	15.5293	0.033543	5.19933	0.0284223	#N/A	#N/A	3504.24	313.044	313.044	210.996	21.5832	62.9597	203.652	59.6654	80.9767	#N/A	#N/A	#N/A	6.02116
Cst19CL01-6-16	19CL01-6	627.555	94.0843	6.28009		0.742719	36.8759	-6798.62	-24.4055	-3.1374	-106.232	4.41327	20.4178	0.219616	18.675	0.033335	5.55275	0.0275418	#N/A	#N/A	3702.23	422.225	422.225	209.489	22.8715	62.9848	137.614	50.5281	63.5566	#N/A	#N/A	#N/A	5.65845
Cst19CL01-6-17	19CL01-6	359.176	62.1007	3.27084		-0.118497	-175.303	-5790.52	-13.5733	-23.7831	-33.4269	-114.842	-27.7001	1.04923	12.7026	0.0416104	6.17357	0.0554316	#N/A	#N/A	3918.98	240.981	240.981	259.219	31.4176	79.0213	446.798	108.81	163.518	#N/A	#N/A	#N/A	6.61446
Cst19CL01-6-18	19CL01-6	522.994	76.0902	3.96383		0.600442	43.4067	56004.2	178.544	890.201	30.0558	477.721	698.158	1.2992	11.1729	0.0411898	6.87694	0.114412	#N/A	#N/A	3799.86	273.63	273.63	255.846	34.6102	79.6217	566.577	114.454	185.489	#N/A	#N/A	#N/A	6.73302
Cst19CL01-6-19	19CL01-6	384.088	73.8462	5.00593		0.318083	80.8997	-234.789	-16.0291	-1.32227	-32.6975	-4.27704	-33.6459	1.40144	10.3901	0.0414262	6.19922	0.100033	#N/A	#N/A	3914.88	209.437	209.437	258.083	31.392	78.6823	619.884	113.975	193.449	#N/A	#N/A	#N/A	6.59236
Cst19CL01-6-20	19CL01-6	-82.5392	40.8619	2.29944		0.123835	116.516	-294.244	-10.2007	0.0333074	41.3486	-0.441817	-69.7451	0.0926341	47.34	0.0327089	8.04993	-0.0319958	#N/A	#N/A	4707.89	0.193291	0.193291	203.673	32.3072	65.6767	2.36388	0.187078	0.195369	#N/A	#N/A	#N/A	4.3262
Cst19CL01-6-21	19CL01-6	154.248	522.888	21.0863		-2.85572	-51.7402	34.8421	2.52741	0.0526623	8.66632	0.00724601	49.4341	0.214076	8.0005	0.0312896	2.355	0.0969429	#N/A	#N/A	1215.34	183.109	183.109	198.309	9.19635	56.3927	182.156	27.5741	56.322	#N/A	#N/A	#N/A	16.3172
Cst19CL01-6-22	19CL01-6	568.773	111.29	3.58972		-0.0327683	-1759.01	42.501	6.63311	0.103249	34.3043	0.0331043	66.101	0.181785	31.0433	0.0281849	6.71303	-0.274549	#N/A	#N/A	3651.74	457.672	457.672	183.719	25.6762	60.2412	129.62	79.6564	87.647	#N/A	#N/A	#N/A	5.03101
Cst19CL01-6-23	19CL01-6	367.751	128.998	1.94516		-0.669901	-74.6717	2211	38.7109	18.066	49.9984	133.781	41.0915	1.82127	9.05714	0.0490747	5.24984	0.120053	#N/A	#N/A	3489.78	229.852	229.852	306.24	31.6062	91.4149	830.639	128.454	239.459	#N/A	#N/A	#N/A	8.77532
Cst19CL01-6-24	19CL01-6	340.286	153.922	2.14824		0.488686	107.42	27.9145	5.13404	0.315723	9.29746	-59.6784	-101.059	1.77178	8.97488	0.0467634	4.51341	0.25264	#N/A	#N/A	3361.21	211.719	211.719	292.969	25.8409	85.568	860.906	118.551	222.443	#N/A	#N/A	#N/A	8.71616
Cst19CL01-6-25	19CL01-6	583.792	66.4218	1.45995		-0.156097	-158.68	-870.187	-12.7296	0.0412256	34.866	-0.360939	-136.717	0.247737	20.5211	0.0276939	6.81488	-0.00625669	#N/A	#N/A	3792.8	441.275	441.275	177.072	24.0653	55.7722	134.414	54.2894	66.0938	#N/A	#N/A	#N/A	4.66862
Cst19CL01-6-26	19CL01-6	-11947.6	101.344	1.84767		-0.691392	-49.8825	-1000.56	-22.0129	-1.89398	-55.4119	-18.3385	-29.3475	0.942785	8.53843	0.0341606	4.97801	-0.101157	#N/A	#N/A	3585.7	200.993	200.993	217.369	21.6111	65.5205	531.58	84.4624	164.322	#N/A	#N/A	#N/A	6.0621
Cst19CL01-6-27	19CL01-6	188.645	77.4572	1.42205		-1.17838	-27.5748	14851	13.5355	-2.10228	-14.9511	62.7676	40.1356	0.300425	18.0633	0.0329215	6.13805	-0.00349713	#N/A	#N/A	3722.85	346.546	346.546	206.536	25.0299	63.2619	167.309	62.2099	79.2358	#N/A	#N/A	#N/A	5.54779
Cst19CL01-6-28	19CL01-6	302.81	79.4441	1.54728		-1.06084	-31.1261	-32819.3	-13.6727	5.10477	14.5076	-19.7304	-103.508	0.320864	17.283	0.030811	5.87531	0.0416069	#N/A	#N/A	3751.38	295.5	295.5	193.785	22.5384	59.1207	193.559	66.3517	85.9949	#N/A	#N/A	#N/A	5.16569
Cst19CL01-6-29	19CL01-6	152.535	51.9273	0.860322		-0.567289	-38.5935	14126.6	12.8154	-1.97516	-14.2664	9.56751	108.658	0.0149499	143.381	0.038722	6.72249	0.100739	#N/A	#N/A	3771.17	548.754	548.754	241.209	31.8756	74.7	-16.7802	0.649381	0.65258	#N/A	#N/A	#N/A	6.39613
Cst19CL01-6-30	19CL01-6	23.048	64.1042	1.20642		-1.42875	-19.8919	-3794.82	-14.8281	-0.00470158	-367.177	0.0255268	61.8323	0.129796	29.2003	0.0338852	6.13058	0.0429199	#N/A	#N/A	3912.24	459.342	459.342	215.535	26.3514	66.6703	56.46	35.1896	39.1558	#N/A	#N/A	#N/A	5.50926
19CL02-2
Cst19CL02-2-1	19CL02-2	290717	43.6259	9.20948		0.168718	92.432	4806.85	8.9066	25.5315	24.1949	61.3635	35.8428	0.987382	14.5298	0.0323214	8.18256	-0.0682408	#N/A	#N/A	4315.32	76.5957	76.5957	201.208	32.5158	65.2903	425.072	111.741	156.507	#N/A	#N/A	#N/A	4.66264
Cst19CL02-2-2	19CL02-2	282.873	62.2881	6.22986		0.368751	56.1962	-1402.37	-14.3513	-17.969	-26.4059	-64.8816	-19.8455	2.68866	9.39791	0.0482242	6.70194	0.0778064	#N/A	#N/A	3993.4	197.157	197.157	302.761	40.1852	94.4095	881.566	142.603	259.007	#N/A	#N/A	#N/A	7.58153
Cst19CL02-2-3	19CL02-2	390.926	268.914	28.795		1.41207	45.8715	41.0549	5.34295	0.098861	11.1656	-0.311867	-121.733	0.303357	9.25922	0.0318361	3.43651	-0.0888025	#N/A	#N/A	2643.3	222.673	222.673	201.358	13.6318	58.1378	237.715	41.8802	76.8621	#N/A	#N/A	#N/A	7.61767
Cst19CL02-2-5	19CL02-2	-123963	114.444	6.57365		0.421978	79.7048	-991.591	-23.1899	0.0621522	22.6742	-2.18207	-92.1684	0.142771	21.937	0.0336376	5.08601	0.168027	#N/A	#N/A	2560.19	245.743	245.743	214.176	21.7653	64.7408	90.0163	39.7246	47.3693	#N/A	#N/A	#N/A	8.36564
Cst19CL02-2-6	19CL02-2	349.723	34.1094	1.82747		-0.0479551	-288.79	9986.77	8.12753	30.5597	30.8451	54.3474	37.0311	0.438977	21.5671	0.0288125	8.35247	-0.0721556	#N/A	#N/A	4003.23	555.918	555.918	179.891	29.7498	58.8248	172.515	75.7449	90.7838	#N/A	#N/A	#N/A	4.49365
Cst19CL02-2-7	19CL02-2	-70380.6	133.741	-13.4655		-0.23606	-164.539	-192.288	-67.8121	0.110725	12.706	-4.86944	-59.1631	0.317998	13.23	0.032827	4.44884	0.120195	#N/A	#N/A	3414.55	219.046	219.046	207.025	18.1609	60.9306	216.949	55.2958	81.268	#N/A	#N/A	#N/A	6.06303
Cst19CL02-2-8	19CL02-2	-1.04049e+06	25.3343	-1.91685		0.0132637	803.64	-10767.1	-11.1688	-4.5724	-57.8561	-94.9788	-39.8063	0.201804	34.0539	0.0265455	9.58735	-0.0377902	#N/A	#N/A	3105.13	613.34	613.34	169.357	32.3954	58.0273	38.3353	36.107	39.1404	#N/A	#N/A	#N/A	5.45411
Cst19CL02-2-9	19CL02-2	-122973	31.9548	-2.03411		0.0816759	162.17	-849.782	-8.31814	0.138733	10.1351	-7.5255	-40.7808	0.158761	33.6862	0.0279309	9.45223	0.0436509	#N/A	#N/A	2795.11	134.065	134.065	173.717	32.5709	58.9171	46.828	43.1126	46.811	#N/A	#N/A	#N/A	6.21505
Cst19CL02-2-11	19CL02-2	309.112	157.604	-15.5367		0.933146	51.408	-16.8855	-199.542	0.121813	18.3487	-0.257549	-183.359	0.211508	16.4027	0.0317213	4.70053	0.0164973	#N/A	#N/A	2959.55	334.022	334.022	202.354	19.0286	60.7349	143.144	47.7608	63.2655	#N/A	#N/A	#N/A	6.83731
Cst19CL02-2-12	19CL02-2	466.495	19.4458	-3.29512		0.0517904	173.054	-1224.07	-6.2926	-8.09463	-34.3796	-20.1401	-31.027	1.31631	24.9413	0.0404895	12.8112	-0.0284472	#N/A	#N/A	4393.44	304.409	304.409	242	60.9201	91.1124	76.025	174.253	200.686	#N/A	#N/A	#N/A	5.50821
Cst19CL02-2-13	19CL02-2	526.111	98.1445	52.0375		-0.328463	-137.062	-2150.17	-15.5031	0.493074	11.8285	-5.03918	-84.2288	0.162689	29.9316	0.0265114	8.09269	-0.0245101	#N/A	#N/A	3134.71	521.784	521.784	175.178	29.0162	58.7509	90.1436	50.4406	55.8648	#N/A	#N/A	#N/A	5.58834
Cst19CL02-2-14	19CL02-2	930.516	30.1326	15.5269		0.0894578	180.908	-1321.89	-17.0724	-4.87053	-48.1868	-8.92144	-67.4387	1.74078	50.4624	0.0513083	27.927	-0.976877	#N/A	#N/A	3635.36	0.579198	0.579198	196.909	84.6151	94.9907	83.5968	53.9299	56.0387	#N/A	#N/A	#N/A	5.41648
Cst19CL02-2-15	19CL02-2	221.528	64.741	21.7279		-0.165671	-140.328	-493.517	-14.3558	-2.75113	-28.9218	-5.479	-33.0057	0.75996	13.3563	0.0361034	5.97138	-0.0452552	#N/A	#N/A	3761.23	319.967	319.967	226.06	26.6644	68.9832	370.226	93.0543	136.069	#N/A	#N/A	#N/A	6.01027
Cst19CL02-2-16	19CL02-2	-84037.8	13.693	6.60623		0.0245489	342.492	-389.273	-6.80281	0.0233395	18.0366	-2.4547	-36.7847	0.106812	54.8293	0.0289238	20.3729	0.528558	#N/A	#N/A	-2113.35	205.404	205.404	149.096	51.8813	63.3096	-9.91475	1.56204	1.61392	#N/A	#N/A	#N/A	-7.05495
Cst19CL02-2-17	19CL02-2	-95421.9	10.1233	5.93027		-0.0136962	-662.656	-507.995	-6.12385	0.0612818	20.5604	-3.76044	-38.5097	0.62424	30.0561	0.019125	18.2137	0.00912097	#N/A	#N/A	6.7355	50.744	50.744	117.049	42.6022	54.0882	134.646	88.622	98.0768	#N/A	#N/A	#N/A	1737.79
Cst19CL02-2-18	19CL02-2	443.954	37.3292	12.1622		0.173382	78.4463	-1923.9	-8.29711	0.0185273	62.1951	-3.03488	-84.336	0.29117	24.409	0.0310877	8.74231	0.141362	#N/A	#N/A	4102.32	340.198	340.198	197.492	34.3124	65.6082	127.932	61.5486	71.2686	#N/A	#N/A	#N/A	4.81415
Cst19CL02-2-19	19CL02-2	-56221.1	126.76	98.3436		-0.485866	-86.7865	-88.9785	-99.8547	0.041026	16.4128	-0.00946222	-175.485	0.144318	19.8091	0.0317717	4.49393	0.0987818	#N/A	#N/A	3018.73	252.131	252.131	200.487	17.7444	58.9893	101.763	39.4416	48.5857	#N/A	#N/A	#N/A	6.64146
Cst19CL02-2-20	19CL02-2	3725.87	147.978	139.029		0.303435	138.842	-81.1291	-146.866	0.14365	14.314	-2.42179	-105.109	0.305502	12.4554	0.0317633	4.26579	0.0418313	#N/A	#N/A	3269.7	262.044	262.044	200.546	16.8689	58.8132	210.985	51.1093	77.6589	#N/A	#N/A	#N/A	6.13348
Cst19CL02-2-21	19CL02-2	2.57407e+06	52.9722	56.8416		-0.0251652	-744.066	41233.8	10.7589	69.2432	40.4055	392.221	27.3114	0.431042	17.3058	0.0292972	7.34836	0.0935206	#N/A	#N/A	3977.25	251.729	251.729	183.571	26.7215	58.2957	243.418	77.2955	100.125	#N/A	#N/A	#N/A	4.61553
Cst19CL02-2-22	19CL02-2	619.207	16.6631	8.0655		0.0670153	129.829	-19298.5	-120.062	-1102.05	-34.9121	-6439.31	-70.8496	5.78434	14.6657	0.0568575	13.9553	0.202617	#N/A	#N/A	4374.97	289.657	289.657	326.279	89.0211	127.221	800.761	213.568	297.774	#N/A	#N/A	#N/A	7.45784
Cst19CL02-2-23	19CL02-2	181.75	387.602	357.559		2.82994	39.7955	43.7806	5.04047	0.115879	38.3409	0.0306305	48.0853	0.188607	10.7432	0.0289035	3.23593	-0.096116	#N/A	#N/A	1800.08	294.066	294.066	183.188	11.6949	52.803	151.684	31.1203	51.6933	#N/A	#N/A	#N/A	10.1767
Cst19CL02-2-24	19CL02-2	508.155	102.607	17.6034		0.558952	55.6338	-1282.18	-17.9239	-43.5023	-30.4346	-233.093	-22.1444	11.6665	6.51557	0.134612	6.27984	0.373823	#N/A	#N/A	3859.9	177.736	177.736	783.064	91.3279	226.441	2101.65	186.032	447.36	#N/A	#N/A	#N/A	20.2872
Cst19CL02-2-25	19CL02-2	243.334	282.006	99.2239		0.261152	282.245	37.0278	3.32964	0.0481141	12.9766	0.0127143	40.829	0.18011	11.9746	0.0313288	2.94214	-0.100031	#N/A	#N/A	2296.34	242.609	242.609	198.382	11.4884	56.8077	148.65	34.7055	53.9442	#N/A	#N/A	#N/A	8.63907
Cst19CL02-2-26	19CL02-2	223.385	324.962	100.218		0.786934	109.813	34.52	3.51934	0.0796837	9.0052	0.0499881	18.8478	0.335559	8.25688	0.0335341	2.92917	-0.00392493	#N/A	#N/A	2219	195.844	195.844	212.09	12.2201	60.6824	264.39	41.4682	82.7094	#N/A	#N/A	#N/A	9.5579
Cst19CL02-2-27	19CL02-2	321.869	183.975	57.1271		-0.0628947	-863.793	40.4032	4.86938	0.260305	43.7438	0.118338	39.6001	0.180346	15.3684	0.032723	3.83785	-0.141678	#N/A	#N/A	2947.32	314.558	314.558	206.687	15.614	60.032	131.497	41.1587	56.1277	#N/A	#N/A	#N/A	7.0127
Cst19CL02-2-28	19CL02-2	150.865	280.94	96.3533		0.0490335	1580.09	42.519	4.7452	0.0626627	16.3638	-0.0253345	-146.349	0.202682	12.1184	0.0295126	3.13336	0.15503	#N/A	#N/A	2269.18	217.33	217.33	187.015	11.5554	53.7992	163.284	38.0588	58.7459	#N/A	#N/A	#N/A	8.24152
Cst19CL02-2-29	19CL02-2	490.858	19.5782	5.58365		0.0987849	93.4244	-9558.36	-7.443	1.08642	247.761	-71.287	-42.1729	-0.0296117	-87.9287	0.0354722	12.1009	-0.0790386	#N/A	#N/A	4653.57	3.15866	3.15866	214.93	51.3988	79.3991	-58.9256	3.68569	3.73377	#N/A	#N/A	#N/A	4.61861
Cst19CL02-2-30	19CL02-2	349.207	158.481	44.8425		0.474679	92.2647	-429.456	-73.6946	-7.85234	-63.3542	-57.9235	-38.922	1.52522	18.4183	0.0395547	4.12671	-0.0485594	#N/A	#N/A	3284.73	187.198	187.198	248.597	20.2106	72.6468	679.927	80.7039	102.036	#N/A	#N/A	#N/A	7.56826
19CL02-3
Cst19CL02-3-1	19CL02-3	656.484	61.8856	4.68181		0.0554867	354.641	5450.94	12.4102	51.2443	25.0648	166.16	24.1199	1.96536	11.122	0.0538806	6.47181	0.0758697	#N/A	#N/A	3893.79	215.702	215.702	331.854	42.1038	101.806	665.614	149.96	243.721	#N/A	#N/A	#N/A	8.52264
Cst19CL02-3-2	19CL02-3	599.265	69.2999	6.84312		0.0725148	306.048	-9391.96	-13.8364	1.01841	324.955	-4.27976	-144.158	0.220537	25.1912	0.0331512	6.56839	-0.0574927	#N/A	#N/A	4172.25	272.928	272.928	207.617	26.8713	64.1833	113.449	67.7269	77.8108	#N/A	#N/A	#N/A	4.97614
Cst19CL02-3-3	19CL02-3	285.253	203.716	10.7527		1.02884	100.638	26.2409	7.47446	0.24795	14.032	-29.1758	-75.3645	1.56811	12.5828	0.0505968	6.01118	0.398336	#N/A	#N/A	3278.08	275.377	275.377	316.033	37.2052	95.7114	726.629	153.62	232.083	#N/A	#N/A	#N/A	9.6408
Cst19CL02-3-4	19CL02-3	1089.05	70.4694	5.08294		0.0322061	816.949	-20847.4	-17.1378	-33.6351	-53.7465	-0.165095	-19.358	0.322826	21.3289	0.0329464	5.97422	-0.0171906	#N/A	#N/A	4126.63	306.352	306.352	206.811	24.3572	62.9887	150.729	64.6616	77.7639	#N/A	#N/A	#N/A	5.01162
Cst19CL02-3-5	19CL02-3	379.579	178.519	11.1879		1.05156	43.3552	38.2566	4.98474	0.0511189	25.1771	0.0424846	31.4274	0.237485	13.1998	0.0330293	3.76087	0.0072177	#N/A	#N/A	2926.36	281.578	281.578	208.616	15.4648	60.5938	178.064	45.1048	66.372	#N/A	#N/A	#N/A	7.12886
Cst19CL02-3-6	19CL02-3	329.963	237.341	14.6331		0.992269	64.1102	-2141.44	-41.8072	-4.33665	-100.091	-0.417469	-192.16	0.264283	11.8943	0.0338468	3.62872	-0.00497238	#N/A	#N/A	2444.63	286.028	286.028	213.736	15.2823	61.92	196.578	43.3931	67.7153	#N/A	#N/A	#N/A	8.74309
Cst19CL02-3-7	19CL02-3	276.473	263.347	86.2847		0.314944	219.67	39.6039	5.42976	0.0806877	11.5888	0.0816982	21.9809	0.300458	9.59695	0.0336087	3.24613	-0.0155767	#N/A	#N/A	2360.58	202.815	202.815	212.427	13.5977	61.2119	233.337	43.4191	77.7255	#N/A	#N/A	#N/A	8.99892
Cst19CL02-3-8	19CL02-3	775.879	55.4415	-178.117		0.208625	88.2234	14661.1	11.1126	-7.95115	-11.4794	18.9964	93.8947	0.174086	32.2932	0.0292337	7.07525	-0.00138565	#N/A	#N/A	3748.09	436.159	436.159	183.361	25.657	57.6864	50.2533	59.0899	64.5865	#N/A	#N/A	#N/A	4.89212
Cst19CL02-3-9	19CL02-3	627.112	108.012	-31.5682		0.400077	84.826	-29873.3	-19.2853	11.3439	19.268	21.2976	18.2388	0.262667	18.5803	0.0357555	5.31962	-0.0142849	#N/A	#N/A	3518.56	292.708	292.708	227.102	24.032	68.7058	141.108	58.3551	73.5397	#N/A	#N/A	#N/A	6.45439
Cst19CL02-3-10	19CL02-3	318.571	253.789	-54.0289		0.562358	124.103	38.1399	4.66122	0.0721355	15.0794	-4.7378	-70.3677	0.213673	11.846	0.0334767	3.54715	-0.0223158	#N/A	#N/A	2484.18	259.374	259.374	211.485	14.7373	61.0017	160.743	38.2336	59.8071	#N/A	#N/A	#N/A	8.51329
Cst19CL02-3-11	19CL02-3	477.917	119.893	-20.7506		0.138976	266.743	1.51712e+06	101.253	1182.86	346.658	7989.4	318.138	0.39194	15.9717	0.0429882	6.0885	0.167703	#N/A	#N/A	3432.78	317.875	317.875	271.514	32.6806	83.166	240.222	74.8003	100.242	#N/A	#N/A	#N/A	7.90946
Cst19CL02-3-12	19CL02-3	376.51	90.8581	-28.2631		0.480477	53.0387	-109039	-20.108	-245.938	-49.9599	-815.003	-38.49	0.561437	13.1195	0.0375651	5.30789	0.0154491	#N/A	#N/A	3814.46	247.734	247.734	235.529	24.6088	70.4912	313.254	81.3807	120.147	#N/A	#N/A	#N/A	6.17462
Cst19CL02-3-13	19CL02-3	210.622	263.416	6.22003		0.430744	166.32	27.833	4.88542	0.314538	9.11493	-2.64657	-124.072	1.55938	5.964	0.0464871	3.4108	0.113942	#N/A	#N/A	3109.97	179.4	179.4	291.551	19.4404	83.5017	840.58	77.2504	200.081	#N/A	#N/A	#N/A	9.37471
Cst19CL02-3-14	19CL02-3	276.7	230.32	7.92283		2.51645	27.2233	38.0006	5.06777	0.120601	12.0691	0.174636	19.0386	0.408241	8.92557	0.0354078	3.80016	0.0837745	#N/A	#N/A	2732.51	229.761	229.761	223.299	16.6793	64.7207	310.349	52.8007	99.4652	#N/A	#N/A	#N/A	8.17195
Cst19CL02-3-15	19CL02-3	-58157.2	76.1301	2.82049		0.450982	57.0782	-691.049	-15.3256	0.111898	12.6598	0.0991125	20.2063	0.236311	21.5309	0.0331037	6.06099	0.159385	#N/A	#N/A	3383.63	235.998	235.998	207.714	24.7782	63.298	130.579	56.0826	67.252	#N/A	#N/A	#N/A	6.1388
Cst19CL02-3-16	19CL02-3	623.931	98.9678	3.53386		0.924153	32.4754	-941.399	-23.7048	-7.45889	-36.325	-27.3272	-28.7159	1.42056	8.47944	0.0389839	5.09714	0.0169313	#N/A	#N/A	3795.87	186.762	186.762	247.227	25.1109	74.5476	701.445	105.294	205.899	#N/A	#N/A	#N/A	6.51305
Cst19CL02-3-17	19CL02-3	628.48	97.5428	4.612		0.742414	38.5371	-8760.04	-18.6265	-11.8123	-57.4369	-128.756	-47.8763	0.354356	15.5924	0.0329758	5.57911	-0.140652	#N/A	#N/A	3677.34	234.656	234.656	207.265	22.7773	62.4683	204.386	68.5214	92.8239	#N/A	#N/A	#N/A	5.63627
Cst19CL02-3-18	19CL02-3	302.007	209.805	11.5837		0.713754	115.224	37.482	6.97719	0.139901	34.5709	0.133542	47.8899	0.229549	18.1322	0.0337711	5.06539	-0.0285209	#N/A	#N/A	2610.36	324.525	324.525	213.297	21.298	63.5794	164.44	60.7232	77.2298	#N/A	#N/A	#N/A	8.17118
Cst19CL02-3-19	19CL02-3	-146876	86.6451	14.6277		0.83257	29.5507	-1644.6	-16.7811	0.102193	17.8644	-8.04003	-41.7387	0.379896	14.5237	0.0333785	6.1396	-0.0873111	#N/A	#N/A	1034.83	880.266	880.266	212.291	25.9192	65.4957	227.26	63.7594	89.3216	#N/A	#N/A	#N/A	20.5145
Cst19CL02-3-20	19CL02-3	-53630.7	107.501	16.5371		1.39402	21.8906	-825.116	-28.3602	-8.59359	-35.8687	-61.6998	-31.2907	2.24538	7.3435	0.0510362	5.16525	0.118777	#N/A	#N/A	3643.94	196.619	196.619	317.18	31.8849	93.5522	938.367	112.696	246.005	#N/A	#N/A	#N/A	8.70431
Cst19CL02-3-21	19CL02-3	239.938	106.499	25.7228		0.290204	119.322	15377.1	24.6316	-0.160878	-41.6131	104.733	60.8523	0.443978	13.9688	0.0384604	4.97889	-0.0266841	#N/A	#N/A	3565.4	298.642	298.642	244.154	24.2219	73.4244	265.087	70.3384	100.477	#N/A	#N/A	#N/A	6.84789
Cst19CL02-3-22	19CL02-3	342.612	51.878	14.573		-0.069987	-283.148	-35365.6	-10.3348	-153.85	-28.6511	-530.781	-25.9431	0.819386	14.1598	0.0389321	7.33684	0.0798134	#N/A	#N/A	3894.1	330.807	330.807	241.768	34.93	76.2974	361.491	96.7944	137.321	#N/A	#N/A	#N/A	6.20856
Cst19CL02-3-23	19CL02-3	-124978	90.4637	22.3949		0.315971	90.9634	-7093.11	-21.7808	-169.378	-25.6573	-552.6	-30.6154	2.54834	7.67753	0.0517171	5.46558	0.153744	#N/A	#N/A	3564.18	253.171	253.171	320.792	34.2497	95.6262	1024.22	126.156	265.965	#N/A	#N/A	#N/A	9.00045
Cst19CL02-3-24	19CL02-3	378.929	143.773	32.7888		1.22874	31.4928	-1350.23	-40.5063	-10.3025	-60.1666	-141.971	-47.6971	3.01789	6.69632	0.0555414	4.59803	0.163027	#N/A	#N/A	3731.78	178.778	178.778	344.985	30.9253	100.694	1156.59	121.139	284.82	#N/A	#N/A	#N/A	9.2445
Cst19CL02-3-25	19CL02-3	369.044	197.584	210.667		-0.555073	-110.709	40.7666	4.62832	-0.511708	-49.6886	-3.36945	-40.8169	0.15345	14.9896	0.030452	3.70543	-0.0324585	#N/A	#N/A	2867.45	271.388	271.388	192.661	14.069	55.8963	135.721	38.6971	53.3915	#N/A	#N/A	#N/A	6.7189
Cst19CL02-3-26	19CL02-3	677.575	53.2042	52.9463		0.0102764	1868.79	-129906	-10.3921	28.7268	10.3548	13.0195	544.16	0.214029	28.4776	0.0337434	7.28729	0.170979	#N/A	#N/A	3941.66	448.554	448.554	210.598	30.2906	66.5195	91.4682	59.952	67.0381	#N/A	#N/A	#N/A	5.34289
Cst19CL02-3-27	19CL02-3	635.782	94.6579	85.606		0.306227	91.9749	75731.1	17.6588	24.6059	118.837	1099.1	31.9015	0.5325	14.4705	0.0374105	5.84456	0.109482	#N/A	#N/A	3761.05	278.218	278.218	234.133	26.9113	70.9086	297.316	79.8375	112.047	#N/A	#N/A	#N/A	6.22522
Cst19CL02-3-28	19CL02-3	736.253	58.6322	47.9239		-0.0142691	-1504.58	-30316.3	-13.9548	-91.253	-37.3031	-131.952	-39.1779	0.669346	14.6941	0.038382	6.27149	0.00938522	#N/A	#N/A	4021.44	234.669	234.669	239.611	29.6364	73.5626	343.635	94.5526	131.709	#N/A	#N/A	#N/A	5.95834
Cst19CL02-3-29	19CL02-3	683.129	75.1373	50.4893		-0.398885	-70.8607	16373.4	88.2186	-37.9489	-325.172	-5.6564	-22400.8	0.897769	12.3841	0.0401203	6.20137	-0.0428938	#N/A	#N/A	3998.01	247.08	247.08	250.206	30.4554	76.3124	428.252	97.525	148.67	#N/A	#N/A	#N/A	6.25825
Cst19CL02-3-30	19CL02-3	-88990.8	109.312	66.1399		-0.548949	-70.2818	-1888.46	-25.7731	-3.24309	-59.8281	-16.2256	-66.2633	0.550199	12.0167	0.0361293	4.92283	-0.119203	#N/A	#N/A	3526.95	213.463	213.463	227.047	21.9686	67.2699	318.816	72.8954	113.072	#N/A	#N/A	#N/A	6.43748
238U/235U	137.818
BeamSecondsMaximum	60
BeamSecondsMethod	Laser log
BeamSecondsSensitivity	1000
DefaultFitType	Exponential
FitEndCrop	1
FitStartCrop	1
IndexChannel	U238
MaskChannel	U238
MaskMethod	Laser log
MaskResults	TRUE
MaskThreshold	1000
MaskTrim	0
ReferenceMaterial	Z_91500
UIsotopeCutoff	2000000
UIsotopeMode	U238
l232	4.9475e-11
l235	9.8485e-10
l238	1.55125e-10

## Sheet: Muscovite Ar-Ar dating
Table S1-4
Muscovite Ar-Ar dating of Caolong pegmatites
19CL01-2
J = 0.00673063 ± 0.00000337
Incremental Heating			36Ar(Air) [fA]	37Ar(Ca) [fA]	38Ar(Cl) [fA]	39Ar(K) [fA]	40Ar(*) [fA]	Age	± 2s	40Ar(*)	39Ar(K)	K/Ca	± 2s		Normal Isochron			39(k)/36(a)	± 2s	40(a+r)/36(a)	± 2s
								(Ma)		(%)	(%)
GIG02A25LJH-S03	3		33.895	0.0504923	0.422791	29.857	991.422	364.758	113.355	8.92427	0.0355399	331.139	609.538		GIG02A25LJH-S03	3		0.880868	0.0450458	327.75	10.7444
GIG02A25LJH-S04	5		160.26	0.00321009	2.81014	406.408	9803.01	272.051	40.219	17.0064	0.483762	70897.8	2.01883e+06		GIG02A25LJH-S04	5		2.53593	0.0838956	359.67	11.5043
GIG02A25LJH-S05	6	△	28.027	0.0372606	2.9903	1420.44	20951.6	171.163	2.56297	71.4423	1.6908	21348.2	50875.4		GIG02A25LJH-S05	6	△	50.6811	1.7137	1046.05	34.389
GIG02A25LJH-S07	6.5	△	13.0903	0.0129666	1.82238	896.512	13184	170.673	2.2555	77.1124	1.06715	38718.3	272643		GIG02A25LJH-S07	6.5	△	68.4867	2.52209	1305.65	47.0054
GIG02A25LJH-S08	7	△	5.89171	0.0453687	2.62866	1361.46	19840.6	169.202	1.50691	91.8212	1.62059	16804.9	33600.2		GIG02A25LJH-S08	7	△	231.08	11.2018	3666.05	175.389
GIG02A25LJH-S09	7.4	△	7.34115	0	2.64637	1402.17	20354.2	168.572	1.53077	90.245	1.66906	52963.3	298257		GIG02A25LJH-S09	7.4	△	191.002	8.31809	3071.12	131.564
GIG02A25LJH-S11	7.8	△	8.18	0	2.53834	1285.2	18745.5	169.342	1.60544	88.4417	1.52982	52963.3	298257		GIG02A25LJH-S11	7.8	△	157.115	6.57128	2590.13	106.424
GIG02A25LJH-S12	8.3	△	6.45657	0.00291862	2.63813	1365.62	19969.9	169.759	1.52762	91.1626	1.62554	262023	8.37708e+06		GIG02A25LJH-S12	8.3	△	211.508	9.87246	3391.46	156.063
GIG02A25LJH-S13	8.8	△	6.40833	0	2.22784	1170.26	17112.5	169.753	1.60555	89.9107	1.393	52963.3	298257		GIG02A25LJH-S13	8.8	△	182.615	8.54966	2968.85	137.067
GIG02A25LJH-S15	9.4	△	7.33529	0.0468739	4.61631	2433.81	35612.1	169.858	1.38018	94.1695	2.89705	29076.6	63161.5		GIG02A25LJH-S15	9.4	△	331.794	14.5591	5153.4	222.408
GIG02A25LJH-S16	10	△	7.88138	0.0565307	4.79884	2532.48	36984.4	169.545	1.37766	93.9812	3.01451	25087.1	41802.3		GIG02A25LJH-S16	10	△	321.325	13.6897	4991.13	208.923
GIG02A25LJH-S17	10.7	△	10.6732	0	5.4714	2904.29	42471.8	169.764	1.38493	92.9848	3.45709	20204.5	24461.4		GIG02A25LJH-S17	10.7	△	272.111	10.4588	4277.79	160.868
GIG02A25LJH-S19	11.4	△	8.04222	0.00754613	6.26205	3380.58	49481.2	169.909	1.3453	95.3338	4.02403	250873	2.96209e+06		GIG02A25LJH-S19	11.4	△	420.354	17.8059	6451.18	268.405
GIG02A25LJH-S20	12.2	△	8.91314	0	6.51166	3536.16	51793	170.017	1.34655	95.0751	4.20922	492178	1.28168e+07		GIG02A25LJH-S20	12.2	△	396.736	16.13	6109.36	243.583
GIG02A25LJH-S21	13	△	10.2559	0	6.99973	3772.43	55360	170.33	1.35195	94.7212	4.49046	492178	1.28168e+07		GIG02A25LJH-S21	13	△	367.829	14.2488	5696.35	215.952
GIG02A25LJH-S24	14	△	12.7967	0.00224683	8.07323	4380.46	64335.9	170.464	1.35741	94.3572	5.21422	1.09179e+06	4.81555e+07		GIG02A25LJH-S24	14	△	342.312	12.591	5326.04	191.25
GIG02A25LJH-S25	15	△	14.8864	0.00835421	7.79979	4216.05	62107.4	170.953	1.37362	93.2858	5.01853	282611	2.96671e+06		GIG02A25LJH-S25	15	△	283.215	10.1938	4470.59	156.918
GIG02A25LJH-S26	16.5	△	13.726	0	7.75218	4146.87	61038.1	170.819	1.37175	93.6721	4.93617	81028.6	265721		GIG02A25LJH-S26	16.5	△	302.117	11.0098	4745.39	168.751
GIG02A25LJH-S28	18	△	8.14925	0.0433302	8.9898	4898.61	71775.1	170.078	1.32442	96.6817	5.831	63309.8	135468		GIG02A25LJH-S28	18	△	601.112	25.2363	9106.06	375.345
GIG02A25LJH-S29	20	△	6.37486	0.0144069	9.31589	5061.11	74019	169.778	1.31696	97.4527	6.02443	196726	1.23282e+06		GIG02A25LJH-S29	20	△	793.917	37.0124	11909.6	547.053
GIG02A25LJH-S32	22	△	8.64629	0	10.3931	5657.32	82683.4	169.67	1.31845	96.9325	6.73411	74779.4	158990		GIG02A25LJH-S32	22	△	654.306	26.745	9861.37	395.348
GIG02A25LJH-S33	24	△	6.02016	0.0590079	9.8775	5424.59	79193.9	169.49	1.31231	97.7399	6.45709	51480.7	79340.2		GIG02A25LJH-S33	24	△	901.071	43.7375	13453.3	644.15
GIG02A25LJH-S34	28	△	28.1367	0.0304563	14.9132	8052.38	118156	170.315	1.36009	93.3261	9.58504	148059	444439		GIG02A25LJH-S34	28	△	286.187	9.67411	4497.87	147.748
GIG02A25LJH-S36	32		181.879	0.0376025	17.4017	8350.74	127114	176.379	2.69736	70.0517	9.9402	124364	294081		GIG02A25LJH-S36	32		45.9138	1.5132	997.396	31.8926
GIG02A25LJH-S37	37		3.24892	0.00430829	4.87861	2639.19	38553.5	169.589	1.34097	97.5052	3.14153	343048	7.25252e+06		GIG02A25LJH-S37	37		812.331	60.0901	12165.1	894.69
GIG02A25LJH-S38	45		1.82963	0	6.00761	3284.82	48039.9	169.776	1.32199	98.8338	3.91004	197647	660259		GIG02A25LJH-S38	45		1795.34	217.59	26555.1	3211.47
		∑	608.345	0.462881	160.788	84009.8	1.23967e+06
19CL01-2
J = 0.00669887 ± 0.00000335
Incremental Heating			36Ar(a) [fA]	37Ar(ca) [fA]	38Ar(cl) [fA]	39Ar(k) [fA]	40Ar(r) [fA]	Age	± 2s	40Ar(r)	39Ar(k)	K/Ca	± 2s		Normal Isochron			39(k)/36(a)	± 2s	40(a+r)/36(a)	± 2s
								(Ma)		(%)	(%)
GIG02A26LJH-S03	3		1.66958	0	0.0881677	24.0263	264.411	128.627	53.8192	34.6572	0.0537205				GIG02A26LJH-S03	3		14.3906	3.45345	456.87	61.1243
GIG02A26LJH-S04	5		15.4878	0.0155134	1.76025	814.303	11566.9	164.369	2.9331	71.4221	1.8207	29394.5	196096		GIG02A26LJH-S04	5		52.5772	1.78978	1045.34	34.3572
GIG02A26LJH-S05	6	△	8.44872	0	3.60872	1862.66	26906.3	167.027	1.55273	91.3937	4.16472	21288.5	85517		GIG02A26LJH-S05	6	△	220.466	7.56174	3483.16	116.227
GIG02A26LJH-S07	6.5	△	5.5045	0	2.48947	1293.95	18603.8	166.28	1.71947	91.8477	2.89314	524206	3.43748e+07		GIG02A26LJH-S07	6.5	△	235.071	8.51295	3678.24	130.032
GIG02A26LJH-S08	7	△	4.88292	0.00866949	1.91072	967.223	13996.6	167.312	1.98905	90.5328	2.16262	62477.1	761646		GIG02A26LJH-S08	7	△	198.083	7.25418	3164.93	113.212
GIG02A26LJH-S09	7.4	△	9.41864	0.00475612	1.64266	830.624	12172	169.333	2.43241	81.2078	1.8572	97800.3	2.4135e+06		GIG02A26LJH-S09	7.4	△	88.1894	3.03439	1590.83	53.0642
GIG02A26LJH-S11	7.8	△	2.65602	0.00964399	1.70581	898.696	12974.5	166.937	2.02117	94.2025	2.0094	52184.8	632038		GIG02A26LJH-S11	7.8	△	338.361	15.2202	5183.42	229.82
GIG02A26LJH-S12	8.3	△	2.90137	0.0270499	1.97999	1034.91	14900.4	166.504	1.86422	94.4679	2.31396	21425.3	83692.6		GIG02A26LJH-S12	8.3	△	356.698	14.9881	5434.15	224.504
GIG02A26LJH-S13	8.8	△	2.10464	0	1.6785	885.589	12766.3	166.701	2.02575	95.2701	1.98009	9978.61	15229.5		GIG02A26LJH-S13	8.8	△	420.779	20.3835	6364.29	304.583
GIG02A26LJH-S15	9.4	△	3.39075	0.486917	3.02116	1610.66	23322.2	167.411	1.55579	95.8007	3.60129	1852.41	379.492		GIG02A26LJH-S15	9.4	△	475.016	18.6875	7176.68	276.67
GIG02A26LJH-S16	10	△	4.39634	0.290419	3.12733	1660.05	24031	167.369	1.55083	94.7827	3.71171	3200.99	1257.31		GIG02A26LJH-S16	10	△	377.598	14.0628	5764.64	209.847
GIG02A26LJH-S17	10.7	△	3.85712	0.0960209	3.37183	1788.7	25912.3	167.486	1.51098	95.7059	3.99936	10431.8	11525.9		GIG02A26LJH-S17	10.7	△	463.739	17.5266	7016.54	259.366
GIG02A26LJH-S19	11.4	△	3.78117	0.00580902	3.46798	1829.48	26519.1	167.583	1.50058	95.8777	4.09053	176365	3.26362e+06		GIG02A26LJH-S19	11.4	△	483.839	18.5043	7311.97	273.654
GIG02A26LJH-S20	12.2	△	3.04923	0.0233025	3.55458	1882.34	27238.8	167.31	1.48267	96.7257	4.20872	45235.8	214417		GIG02A26LJH-S20	12.2	△	617.316	25.3067	9231.52	371.414
GIG02A26LJH-S21	13	△	2.89615	0.00154825	3.52455	1888.11	27309.5	167.235	1.48127	96.8906	4.22163	682929	4.817e+07		GIG02A26LJH-S21	13	△	651.939	28.5422	9728.1	418.975
GIG02A26LJH-S24	14	△	3.53139	0.0181304	3.91759	2129.51	30865	167.566	1.4444	96.6569	4.76137	65774.7	400806		GIG02A26LJH-S24	14	△	603.022	23.2418	9038.67	340.984
GIG02A26LJH-S25	15	△	3.45223	0.0340944	3.43174	1840.91	26744.2	167.939	1.50229	96.2496	4.1161	30237	89290.3		GIG02A26LJH-S25	15	△	533.253	21.3758	8045.44	316.223
GIG02A26LJH-S26	16.5	△	4.19395	0.00207659	3.57031	1865.38	27129.6	168.116	1.50074	95.5495	4.1708	503042	2.95475e+07		GIG02A26LJH-S26	16.5	△	444.778	16.6718	6767.25	247.98
GIG02A26LJH-S28	18	△	4.41785	0.0167646	3.58284	1905.87	27685.3	167.923	1.49184	95.4138	4.26135	63663.2	418291		GIG02A26LJH-S28	18	△	431.403	15.7432	6565.18	233.915
GIG02A26LJH-S29	20	△	2.41731	0.0271122	2.86676	1536.86	22306.9	167.794	1.57312	96.8259	3.43627	31743.7	120095		GIG02A26LJH-S29	20	△	635.773	28.6855	9526.48	423.339
GIG02A26LJH-S32	22	△	2.91494	0.0228466	3.6053	1960.82	28455	167.763	1.47051	96.992	4.38421	48062.2	209621		GIG02A26LJH-S32	22	△	672.68	28.1392	10060.3	413.312
GIG02A26LJH-S33	24	△	2.12256	0.0338289	2.71819	1454.87	21099.7	167.664	1.60624	97.0438	3.25294	24083.8	70154		GIG02A26LJH-S33	24	△	685.43	38.1134	10239.2	563.749
GIG02A26LJH-S34	28	△	3.68638	0	4.70145	2577.24	37463.3	168.032	1.3982	97.1057	5.76246	22925.8	51465.4		GIG02A26LJH-S34	28	△	699.125	27.8696	10461.1	408.7
GIG02A26LJH-S36	32	△	16.9662	0.050703	6.63263	3533.97	51705.3	169.078	1.4423	91.0433	7.90161	39031.6	79819.6		GIG02A26LJH-S36	32	△	208.295	6.9295	3346.05	108.069
GIG02A26LJH-S37	37	△	4.2239	0.0232668	7.68313	4235.03	61515.5	167.913	1.32623	97.9499	9.46912	101931	447278		GIG02A26LJH-S37	37	△	1002.63	38.8175	14862.2	563.108
GIG02A26LJH-S38	45	△	3.81613	0.0217338	4.47909	2412.89	35041.2	167.881	1.41394	96.8109	5.39498	62171.1	282458		GIG02A26LJH-S38	45	△	632.287	24.9729	9480.89	366.862
		S	126.188	1.22021	84.1208	44724.7	648495
Argon isotope ion beam intensities are given in fA.
Data marked with “Δ” were included in the plateau and isochron age calculations.
Non-radiogenic 40Ar was corrected for using the atmospheric 40Ar/36Ar ratio of 295.5 (40Ar* = 40Arm – 295.5 × 36Arm).

## Sheet: Zircon O isotope
Table S1-5
Zircon O isotopic data of Caolong granite
	PI (nA)	16O/Coeff	SE (%)	18O/16O	SE (%)		δ18Ocorrect	2SE (‰)
19CL05-6@02	1.5824	2072561000	0.0400275	0.00203145	0.0105986		12.1316	0.211972
19CL05-6@04	1.54814	2048189000	0.0461218	0.0020307	0.00694647		11.7561	0.138929
19CL05-6@06	1.51223	2005028000	0.0729446	0.00203034	0.0112727		11.5795	0.225454
19CL05-6@09	1.52553	2007757000	0.0648957	0.00203037	0.0134351		11.5905	0.268701
19CL05-6@13	1.45802	1976347000	0.797554	0.00203063	0.00764599		11.7217	0.15292
19CL05-6@15	1.45606	1914995000	0.0461754	0.00203068	0.0144252		11.7481	0.288503
19CL05-6@17	1.49095	2010327000	0.00817847	0.00203071	0.0137178		11.7636	0.274355
19CL05-6@19	1.53273	2003316000	0.0369905	0.00203037	0.00944588		11.5905	0.188918
PENGLAI@01	1.65625	2172159000	0.0581434	0.00201782	0.00977198		5.33228	0.19544
PENGLAI@02	1.53875	2015089000	0.05208	0.00201795	0.00813552		5.3981	0.16271
PENGLAI@03	1.50104	2021888000	0.0464656	0.00201809	0.00775064		5.46593	0.155013
PENGLAI@04	1.4674	1950015000	0.0281025	0.00201765	0.0136021		5.24999	0.272042
PENGLAI@05	1.47131	1944143000	0.0258048	0.0020177	0.00766211		5.27143	0.153242
PENGLAI@06	1.51168	1987858000	0.0539393	0.00201744	0.00928509		5.14227	0.185702
QINGHU@01	1.63458	2116451000	0.0621046	0.00201852	0.00844132		5.68037	0.168826
QINGHU@02	1.53132	2007327000	0.0415868	0.00201826	0.00824117		5.5532	0.164824
QINGHU@03	1.46647	1933863000	0.0764942	0.00201885	0.00933413		5.84744	0.186683
QINGHU@04	1.494	1985035000	0.0118965	0.00201825	0.0111779		5.54772	0.223559
